## 41 Introduction

42

43 Pathogen survival in a host depends upon effective and continuous immune  
44 evasion. Several bacteria and eukaryotic pathogens have adopted strategies of antigenic  
45 variation to evade host immunity, a process in which they continuously alter antigenic  
46 surface proteins to escape the host's adaptive immune response. The African  
47 trypanosome *Trypanosoma brucei*, a unicellular eukaryotic parasite and causative agent  
48 of human and animal African trypanosomiasis, uses an especially sophisticated system  
49 of antigenic variation. The parasite, which remains extracellular throughout infection and  
50 thus faces a perpetual onslaught of host antibody, periodically "switches" expression of a  
51 surface coat consisting of  $10^7$  copies of a single, immunogenic protein known as the  
52 Variant Surface Glycoprotein (VSG). This process allows parasites to escape host  
53 antibody and maintain a chronic infection.

54

55 Although the *T. brucei* VSG repertoire contains thousands of VSGs, it may not be  
56 sufficient to maintain a chronic infection through VSG switching alone. During an infection,  
57 each *T. brucei* parasite expresses a single VSG at a time from one of ~15 telomeric  
58 Bloodstream Expression Sites (the "active" BES)<sup>1</sup>. The remaining thousands of VSG-  
59 encoding genes are stored in other expression sites, subtelomeric arrays, and  
60 minichromosomes, all of which remain transcriptionally silenced<sup>2</sup>. The parasite switches  
61 its VSG either by transcriptional activation of a silent BES (*in situ* switching) or through a  
62 gene conversion event in which a new VSG is copied into the active expression site. While  
63 gene conversion-based switching allows for the activation of VSGs outside of a BES,  
64 analysis of the *T. brucei* genome has shown that only ~20% of the VSGs in the parasite  
65 genome are full-length genes encoding a functional VSG protein. The remaining ~80% of  
66 VSGs in the parasite genome consist of pseudogenes or gene fragments<sup>2</sup> and cannot  
67 immediately be used for immune evasion through *in situ* or gene conversion switching.  
68 Moreover, the number of VSGs expressed at a single timepoint during experimental  
69 infection sometimes exceeds the total number of intact VSGs in the parasite genome<sup>3,4</sup>,  
70 further indicating that the repertoire of intact VSGs is insufficient for the antigenic diversity  
71 required to maintain a chronic infection.

72

73 Evidence suggests that *T. brucei* deals with this shortage of antigens through  
74 diversification of the VSG repertoire. Many mouse studies have shown that novel VSGs,  
75 generated during infection, predominate at later stages of infection<sup>3,5,6</sup>, while analysis of  
76 parasites from natural human infections revealed expressed VSGs that were nearly  
77 completely absent from the genomes of contemporary field isolates<sup>7</sup>. These observations  
78 suggest that the generation of new VSGs is likely to be a central feature of *T. brucei*  
79 antigenic variation.

80

81 There are two mechanisms thought to be responsible for extending the VSG  
82 repertoire: mosaic formation and *de novo* point mutation. Mosaic VSGs form when two or  
83 more VSG genes combine through segmental gene conversion to form a novel VSG. This  
84 mechanism allows parasites to access pseudogenes and VSG fragments within the  
85 repertoire. While mosaic VSGs have been observed in the literature, they are often found  
86 under extreme experimental conditions<sup>8,9</sup> or late during infection<sup>3,5,10,11</sup> making it difficult

87 to discern how exactly they arose. VSGs also appear to occasionally acquire *de novo*  
88 point mutations though these can be difficult to distinguish from a small gene conversion  
89 event using a similar donor VSG. The origins of these mutations also remain mysterious,  
90 though newly acquired mutations seem rare<sup>9,12–14</sup>. Ultimately, *de novo* mutation of VSGs  
91 would allow parasites to generate new VSG sequences regardless of the contents of their  
92 repertoire, further amplifying diversity.

93  
94 Despite its clear importance, the mechanisms driving VSG diversification, whether  
95 by mutation or recombination, remain poorly understood. It is plausible that DNA damage  
96 and repair may play a role in either mechanism, as expressed VSG genes sit between  
97 two highly repetitive and damage-prone stretches of DNA, the conserved 70bp repeat and  
98 the telomere<sup>2,15</sup>. DNA breaks are frequently observed within the 70bp repeats at the active  
99 expression site<sup>16,17</sup> and near telomeres within silent BESs<sup>17</sup>. Experimental evidence  
100 implicates DNA damage in VSG switching more generally, as a DNA double-strand break  
101 induced upstream of the VSG induces a switch<sup>16,17</sup>, but it is unknown whether DNA  
102 damage could also generate new VSGs.

103  
104 There is a dearth of experimental evidence for the mechanisms driving VSG  
105 diversification because there has been no controlled and reproducible *in vitro* system for  
106 studying the process. Instead, researchers have had to rely on observation alone,  
107 characterizing the sequences of expressed VSGs that were isolated by chance. This  
108 approach has been crucial for generating hypotheses but is insufficient for deciphering  
109 mechanisms driving the process. Here, we have developed a comprehensive toolkit for  
110 the controlled and reproducible study of the diversification of individual VSGs. Using a  
111 highly sensitive barcode-based targeted RNA-seq approach, we show that DNA double-  
112 strand breaks can trigger the formation of mosaic VSGs that are identical to those  
113 observed *in vivo* during infection. Homology appears to drive donor VSG selection, with  
114 microhomology between the parent and donor VSG flanking the site of recombination in  
115 almost every event. Finally, we observe that break-induced diversification is most efficient  
116 in the portion of the VSG gene encoding the exposed top lobe of the VSG N-terminal  
117 domain. We suggest that this could represent a potential hypervariable region within the  
118 VSG, facilitating diversification in the region of the VSG protein where host antibody is  
119 most likely to bind.

## 120 **Results**

121

### 122 **DNA double-strand breaks trigger the formation of mosaic VSGs**

123

124 A number of studies have  
125 suggested that VSG diversification  
126 occurs, at least some of the time,  
127 within the active expression site<sup>3,13</sup>,  
128 with the sequence of the actively  
129 expressed VSG being altered  
130 through recombination and/or  
131 mutation. For this reason, we  
132 focused our analyses on  
133 diversification of the actively  
134 expressed VSG. Because a double-  
135 strand DNA break upstream of the  
136 VSG within the active BES is known  
137 to induce switching<sup>16,17</sup>, we  
138 hypothesized that a break within the  
139 VSG coding sequence might result  
140 in mosaic VSG formation. To  
141 investigate this, we engineered  
142 tetracycline-inducible Cas9  
143 expressing EATRO1125 parasites,  
144 which express the VSG AnTat1.1,  
145 and induced breaks across the  
146 AnTat1.1 coding sequence using a  
147 set of guide RNAs.

148

149 To evaluate potential  
150 recombination outcomes, we  
151 developed VSG Anchored Multiplex  
152 PCR Sequencing (VSG-AMP-seq),  
153 a technique that overcomes  
154 previous obstacles to studying VSG  
155 diversification by providing both  
156 high-throughput and highly accurate  
157 sequences (1A). Our approach uses  
158 long unique molecular indexes  
159 (UMIs) to generate high-confidence,  
160 accurate consensus sequences<sup>18</sup>.  
161 Consolidating reads into consensus  
162 sequences allows errors like PCR chimeras, which occur during later cycles of PCR and  
163 therefore represent a minority of sequences in a consensus group<sup>19</sup>, to be eliminated  
164 while true events are retained. Libraries are prepared by fragmenting VSG-specific cDNA.  
165 Fragments are then end-repaired, A-tailed and ligated to universal adapters containing a

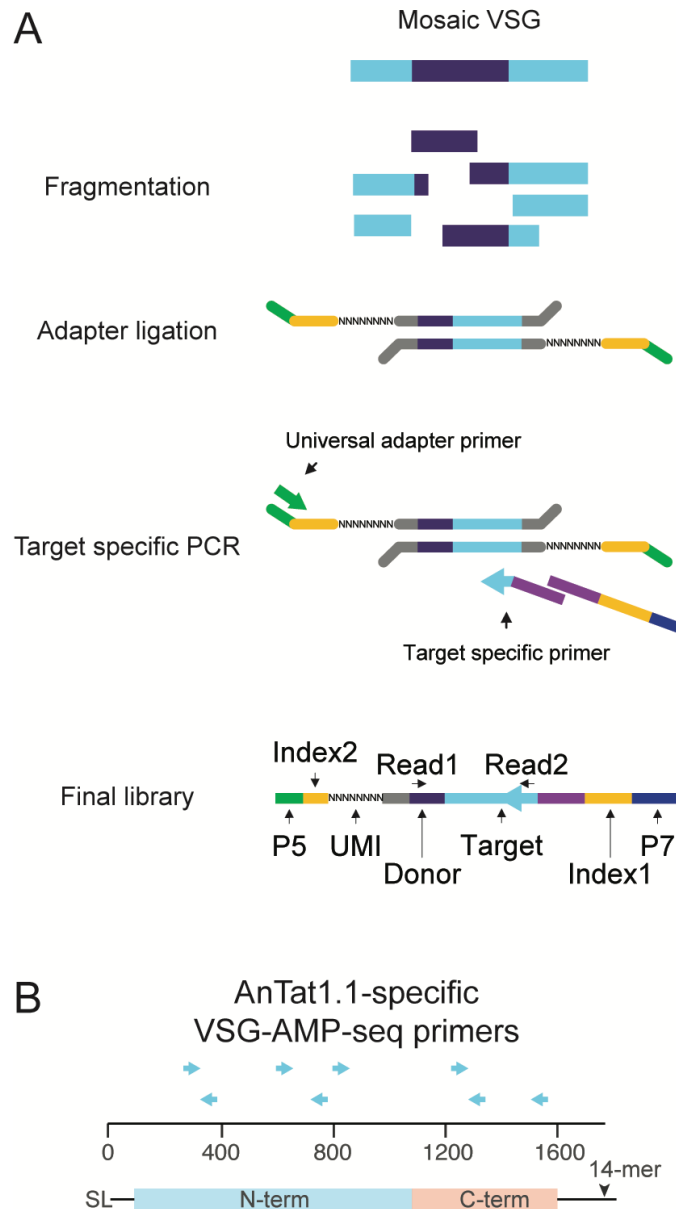

**Figure 1. VSG-AMP-seq is a tool to detect diversification within a VSG of interest**

A) Schematic of the library prep for VSG-AMP-seq. Figure adapted from <sup>51</sup>. B) Locations of target specific primers for VSG AnTat1.1. SL = 5' splice leader cap, 14-mer = 3' sequence conserved in all VSG transcripts

165

166 25bp unique molecular index (1A). A VSG target of interest is selected, and a series of  
167 staggered primers are designed to cover the length of the target VSG's coding sequence  
168 (1B). By pairing target-specific primers with a universal reverse adapter primer, target  
169 VSG fragments are amplified within a sample regardless of their identity. Mosaic reads  
170 are defined as those for whom a portion of the read matches the target and the remainder  
171 matches another VSG (the "donor VSG") within the VSG repertoire (VSGnome) of the  
172 strain being studied<sup>2</sup>. Due to the selective, target-specific amplification, this method can  
173 sensitively detect thousands of rare diversification events, even from mixed samples  
174 where diversified VSGs are a minority of the population.

175  
176 To induce breaks across AnTat1.1, we induced Cas9 expression for 24 hours and  
177 then transfected in DNA amplicons containing a T7 promoter and a guide RNA targeting  
178 various regions throughout the AnTat1.1 coding sequence (cut positions, relative to the  
179 5' end of the VSG transcript: 243, 369, 694, 894, 978, and 1459) to induce breaks in the  
180 VSG. Parasites were collected two days after transfection of the guide, and mosaic  
181 derivatives of AnTat1.1 were analyzed by VSG-AMP-Seq (2A; Supplementary Figures  
182 2A, 2B & 3C). We detected thousands of recombination events from two independently  
183 generated Cas9 clones (C1 = 5956, C2 = 4488).

184  
185 Our analysis revealed diverse mosaic recombination events centered around each  
186 break site. Such events were virtually absent from the negative (no guide) control,  
187 suggesting this process does not occur at a high rate in the absence of a trigger or in the  
188 presence of Cas9 alone. Notably, as the DNA breaks progressed further away from the  
189 center of the AnTat1.1 coding sequence, the frequency of mosaic formation decreased  
190 dramatically (2B). This did not appear to be related to the guide sequences (Supplemental  
191 Figure 2C-G) or to guide cutting efficiency (Supplemental Figure 2H). To ensure that the  
192 observed mosaic events represented mosaic VSGs that were truly expressed by the  
193 parasite, and not technical artifacts or VSGs incapable of being stably expressed by *T.*  
194 *brucei*, we also obtained individual clones of parasites expressing AnTat1.1-derived  
195 mosaic VSGs. Using parasite lines that stably express a VSG-targeted guide RNA after  
196 7 days of Cas9 expression (2C; Supplemental Figure 2A), we isolated 26 mosaic-  
197 expressing clones, 4 from guide 243 and 22 from guide 694, from 6 parental cell lines.  
198 These parasites expressed VSGs containing recombination events identical to those  
199 observed using VSG-AMP-Seq. These results suggest that DNA damage within the active  
200 VSG can trigger the formation of mosaic VSGs, with recombination events centered  
201 around the site of DNA damage.

## 202 203 **Homology drives mosaic VSG formation**

204  
205 Analysis of the mosaic recombination events detected by VSG-AMP-seq revealed  
206 an important role for sequence homology in the formation of mosaic VSGs. Almost all  
207 (C1= 99.71%, C2 = 99.46%) recombination events occurred within a region of shared  
208 sequence between AnTat1.1 and each donor VSG, with an average length of ~9 bps  
209 (average C1 = 9.13 bp, average C2 = 9.44 bp, median = 6 bp) (2F; Supplemental Figure  
210 1A). Within the isolated mosaic clones, we observe short insertions (< 200 bp, average =  
211 47 bp, median = 23 bp) predominating among the events (2D). Although read lengths

212 limited our ability to detect larger insertions with VSG-AMP-seq, approximately 55-60%  
213 of the mosaic recombination reads detected by VSG-AMP-seq contained the same short  
214 insertions (average C1 = 46 bp, average C2 = 45.8 bp) (Supplemental Figure 3B).

215

216 Notably, only a small number of donor VSGs were used for the majority of  
217 recombination events. Upon closer inspection, these donors are members of a 6-VSG  
218 family that contains AnTat1.1 and represent the only sequences within the EATRO1125  
219 VSGnome with significant homology to this VSG (2E). N-terminal recombination events  
220 appear restricted to just these family members (C1 = 100%, C2 = 99.87%). Together,  
221 these results suggest that VSG sequence homology influences the outcome of VSG  
222 recombination after a DNA break.

223

224 To determine the outcome following DNA damage of a VSG when there are no  
225 homologous donors available, we used the same Cas9 system in the commonly used  
226 Lister427 *T. brucei* line to cut the actively expressed VSG, VSG-2, which lacks  
227 homologous family members. After inserting stably expressed guides targeting VSG-2  
228 into the genome, we induced Cas9 expression for 7 days. Parasite clones isolated after  
229 a break had all switched VSG expression from VSG-2, with no evidence of mosaic  
230 recombination (Supplemental Figure 3A; cut position 707, n = 4; cut position 1082, n =  
231 3). This further supports the hypothesis that homology between donor VSGs and the  
232 region surrounding the DNA break drives mosaic formation.

233

234 We sought to determine what proportion of the VSG repertoire contains VSGs that  
235 are members of VSG families and thus capable of diversifying through break-induced  
236 mosaic formation. We defined the phylogenetic distance between VSGs within each of  
237 the EATRO and Lister427 strains using a generalized time reversible model and found  
238 that the proportions of the repertoire within families in each strain were remarkably similar.  
239 In both strains, ~75% of the known VSG sequences are within a family and likely capable  
240 of diversifying through the mechanisms described here (2G).

241

242

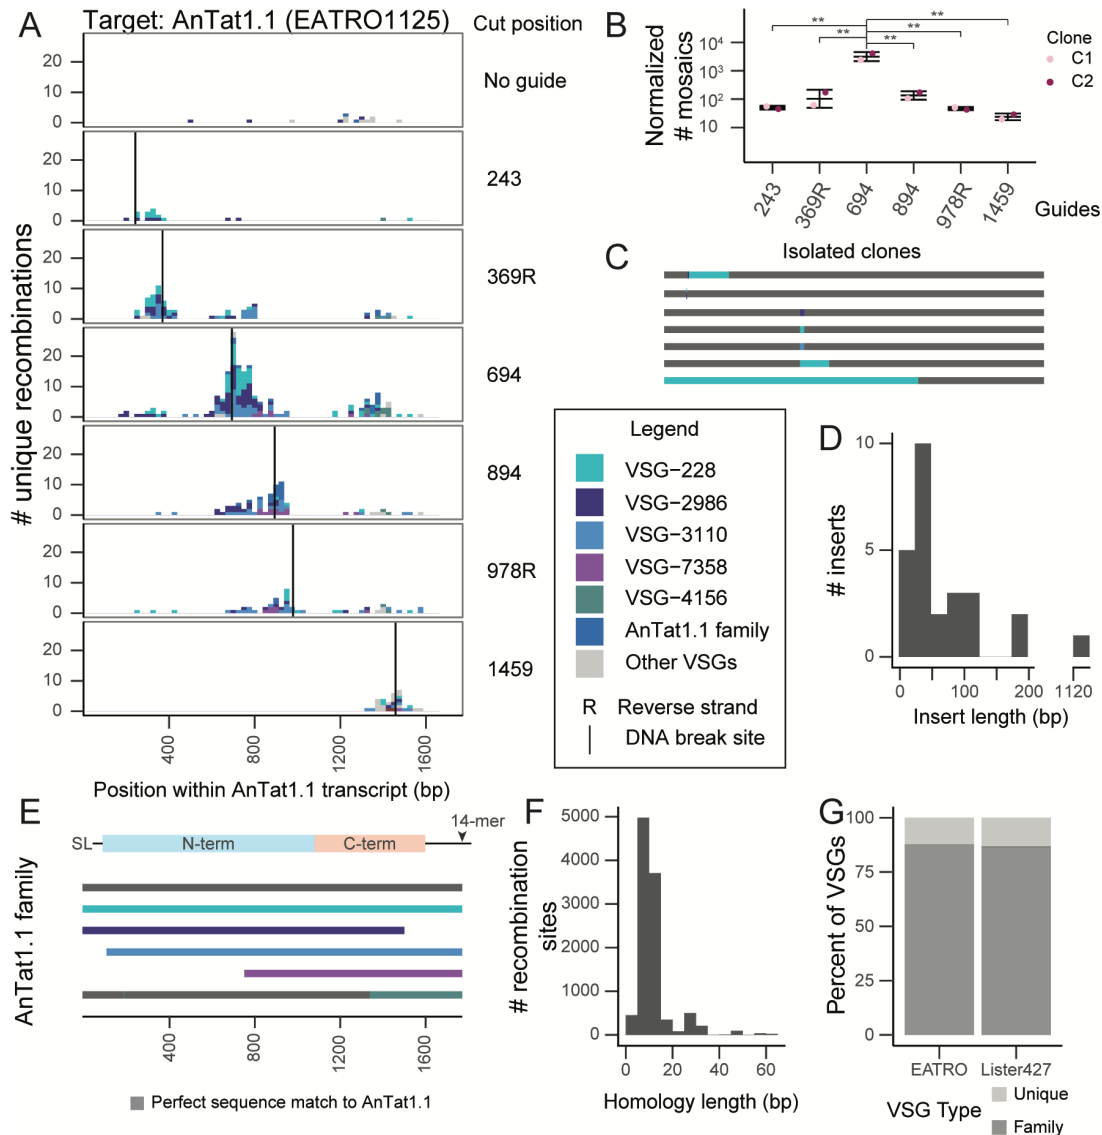

**Figure 2. DNA double-strand breaks trigger mosaic VSG formation if homology is available**

A) A histogram of unique recombination events identified along the AnTat1.1 transcript. The Cas9 DNA break site is indicated by a vertical line. Sections of the histogram are colored to indicate donor VSG identified. R indicates a guide that binds to the reverse strand. The midpoint of the perfect homology between AnTat1.1 and the donor VSG at the recombination site is plotted. If a donor VSG could not be unambiguously identified, the average recombination position was plotted. B) Quantification of mosaic recombination events induced by DNA breaks. The number of recombination events detected within 250bp up or downstream of the cut site was normalized to the number of total unanchored reads aligning within that region compared to the unanchored read count from the region with the smallest coverage to control for sequencing depth. (n=2, two independent clones) Statistical significance was determined with a one-way ANOVA with post-hoc Tukey HSD (\*\* p < 0.01) C) Schematics of mosaic VSGs from clones isolated after DNA breaks within AnTat1.1. Representative sequences shown. D) A histogram of donor VSG insertion lengths identified in all mosaic VSG clones isolated. The insert length only includes newly inserted sequence and does not include recombination sites. E) A schematic of the AnTat1.1 family aligned to the AnTat1.1 transcript. Gray sequences are a perfect match to AnTat1.1. F) A histogram of the length of the shared identity between AnTat1.1 and the donor VSG at the recombination sites. G) Quantification of types of VSGs within the VSGnemes from EATRO1125 and Lister427 parasites. The Lister427 VSGnome has 12 VSGs which are duplicated but lack diversification. SL = 5' splice leader cap, 14-mer = 3' sequence conserved in all VSG transcripts

## 243 Mosaic formation relies on a template for break-induced VSG diversification

244  
 245 Although most AnTat1.1-derived mosaics were identical to the putative donor  
 246 VSG, many of these insertions altered only a few bps in AnTat1.1. We thus reasoned that  
 247 it was possible that these events were *de novo* mutations created during DNA repair that  
 248 happened to match the putative genome-encoded donor VSG. To test this possibility, we  
 249 engineered dox-inducible Cas9-expressing Lister427 parasites and replaced VSG-2 with  
 250 AnTat1.1 at the active expression site, BES1. Lister 427 has a different repertoire of VSGs  
 251 compared to EATRO1125<sup>2,20</sup>. While AnTat1.1 is not endogenously present, there are four  
 252 VSGs nearly identical to the AnTat1.1 family member VSG-2986 (99.5%, 98%, 97.5%,  
 253 and 95.5% nucleotide sequence identity) (3A) that could serve as donor VSGs after a  
 254 break in AnTat1.1. We detected hundreds of recombination events in two independent  
 255 clones (clone 1 = 398, clone 2 = 833; 3C). Upon cutting, all mosaic recombination events  
 256 detected utilized donor VSGs exclusively found in the Lister427 genome (3B), indicating  
 257 that the repair events that generate mosaic VSGs require a template.  
 258

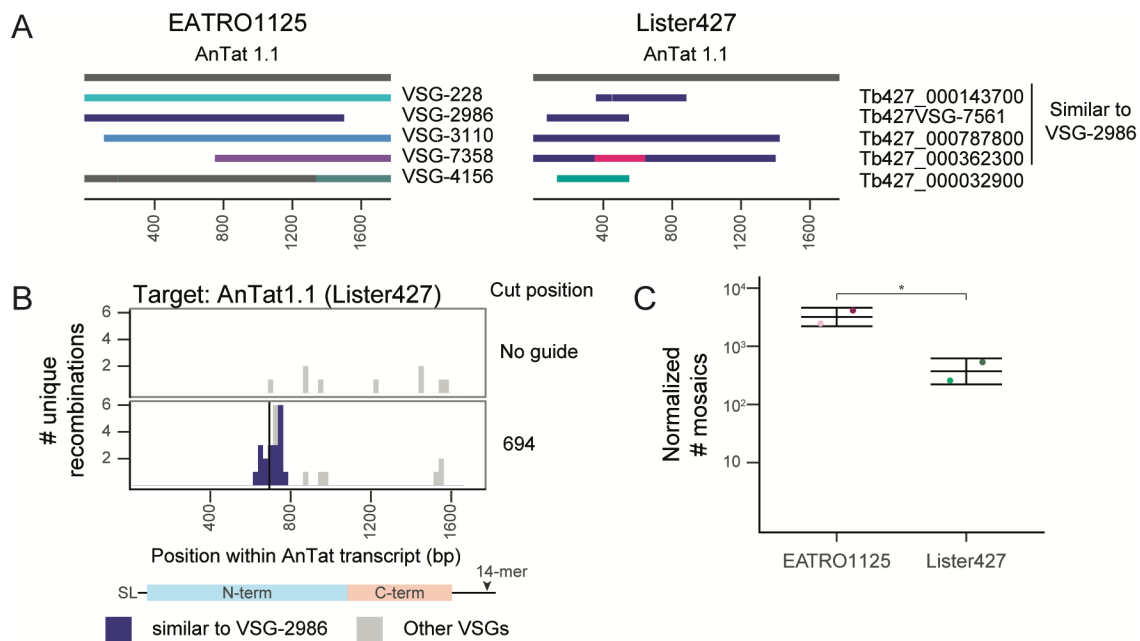

**Figure 3. Nucleotide changes observed in mosaic VSGs arise from templated insertions**

A) Schematics of the EATRO1125 AnTat1.1 VSG family and the VSGs similar to AnTat1.1 found within Lister427. Each is aligned to the AnTat1.1 transcript. For regions that are identical between two donor VSGs, regions are shown in the same color. B) A histogram of unique recombination events identified within Lister427 expressing AnTat1.1 parasites after a cut at position 694 along the AnTat1.1 transcript. The midpoint of the perfect homology between AnTat1.1 and the donor VSG at the recombination site is plotted. All AnTat1.1 family members except VSG-2986 were included as potential identifiable donor VSGs (all Lister VSGs + VSG-228, VSG-3110, VSG-7358, and VSG-4156). C) Quantification of mosaic recombination events induced by Cas9 at position 694. EATRO data is from 2A and 2B. The number of recombination events detected within 250bp up or downstream of the cut site was normalized to the number of total unanchored reads aligning within that region compared to the unanchored read count from the region with the smallest coverage from the EATRO cut sites to control for sequencing depth. SL = 5' splice leader cap, 14-mer = 3' sequence conserved in all VSG transcripts



## 260 **Mosaic VSGs generated *in vitro* are identical to a subset of mosaic VSGs formed *in*** 261 ***vivo***

262  
263 To investigate whether the mosaic VSGs we detected after break induction *in vitro*  
264 reflected the events that occur naturally *in vivo*, we performed VSG-AMP-seq on parasites  
265 isolated from wildtype mouse infections, on day 15 post-infection, when AnTat1.1 has  
266 been mostly eliminated from the blood (Supplemental Figure 4B & 4C). We observed a  
267 strong C-terminal bias to all recombination events (316 recombination events across 7  
268 mice). Very few sequences aligned to AnTat1.1 within the N-terminus, suggesting that  
269 most of these mosaic VSGs were complete replacements of the VSG N-terminal domain  
270 (4A; Supplemental Figure 4A). These donor VSGs shared significantly less homology  
271 with AnTat1.1 than the AnTat1.1 family members, usually only sharing spans of 100bps  
272 or less of imperfect homology within the C-terminal region of the VSGs. Nevertheless,  
273 there was still a short (average = 12 bp) span of perfect identity between AnTat1.1 and  
274 the donor at the recombination site (4E). Since VSGs expressed by parasites at the  
275 second peak of parasitemia are antigenically distinct from AnTat1.1, we reasoned these  
276 N-terminal replacement VSGs ensured complete immune evasion since only a small  
277 portion of AnTat1.1 was retained.

278  
279 We wondered whether this restriction within mouse infections reflected a  
280 mechanistic bias towards recombination within the VSG C-terminal domain or the effect  
281 of host antibody selection, with only the most evasive recombination events surviving. To  
282 investigate these possibilities, we repeated the experiment in  $\mu$ MT mice<sup>21</sup>, which do not  
283 have B-cells and therefore do not generate antibodies. We again analyzed day 15 post-  
284 infection, though AnTat1.1 is never cleared from these infections and parasitemia remains  
285 high throughout (Supplemental Figure 4B & 4C). In  $\mu$ MT mice, mosaic recombination  
286 events span the full length of the VSG, and many are identical to mosaic VSGs observed  
287 *in vitro* (4A; Supplemental Figure 4A) (2144 recombination events across 7 mice). *In vivo*,  
288 we observe short insertions (average = 41 bp) using donors homologous to AnTat1.1  
289 flanked by short (average = 13 bp, median = 9 bp) regions of perfect identity, matching  
290 the patterns we observed *in vitro* (4E & 4F). Interestingly, as in the wildtype infections,  
291 there are an additional subset of recombination events within the C-terminus which are  
292 largely absent *in vitro* and use a much more diverse set of donors (4B). These data  
293 demonstrate that our *in vitro* system recapitulates a subset of *in vivo* recombination  
294 events, but there may be other pathways facilitating recombination *in vivo* in addition to  
295 those that can be triggered by a single, blunt DNA double-strand break.

## 296 297 **Mosaic VSGs form in extravascular spaces during infection**

298  
299 While AnTat1.1 is eliminated from the blood in wildtype mice, it persists within  
300 tissues until at least day 14<sup>4</sup>. Given that parasite clearance is delayed in extravascular  
301 spaces, we wondered if mosaic formation may occur more readily in this parasite niche.  
302 To investigate this, we analyzed all assembled VSGs from a previous study of  
303 extravascular parasite populations<sup>4</sup>. Again, we found AnTat1.1 mosaics present in tissues  
304 identical to those observed in both  $\mu$ MT mice and *in vitro* (4C & 4G). Moreover, we  
305 observe that mosaic derivatives of AnTat1.1 increase over time within tissue spaces during

306 infection (4D). Together, these data suggest that mosaic VSGs form preferentially within  
 307 extravascular spaces, possibly due to the slower VSG-specific parasite clearance in these  
 308 spaces.

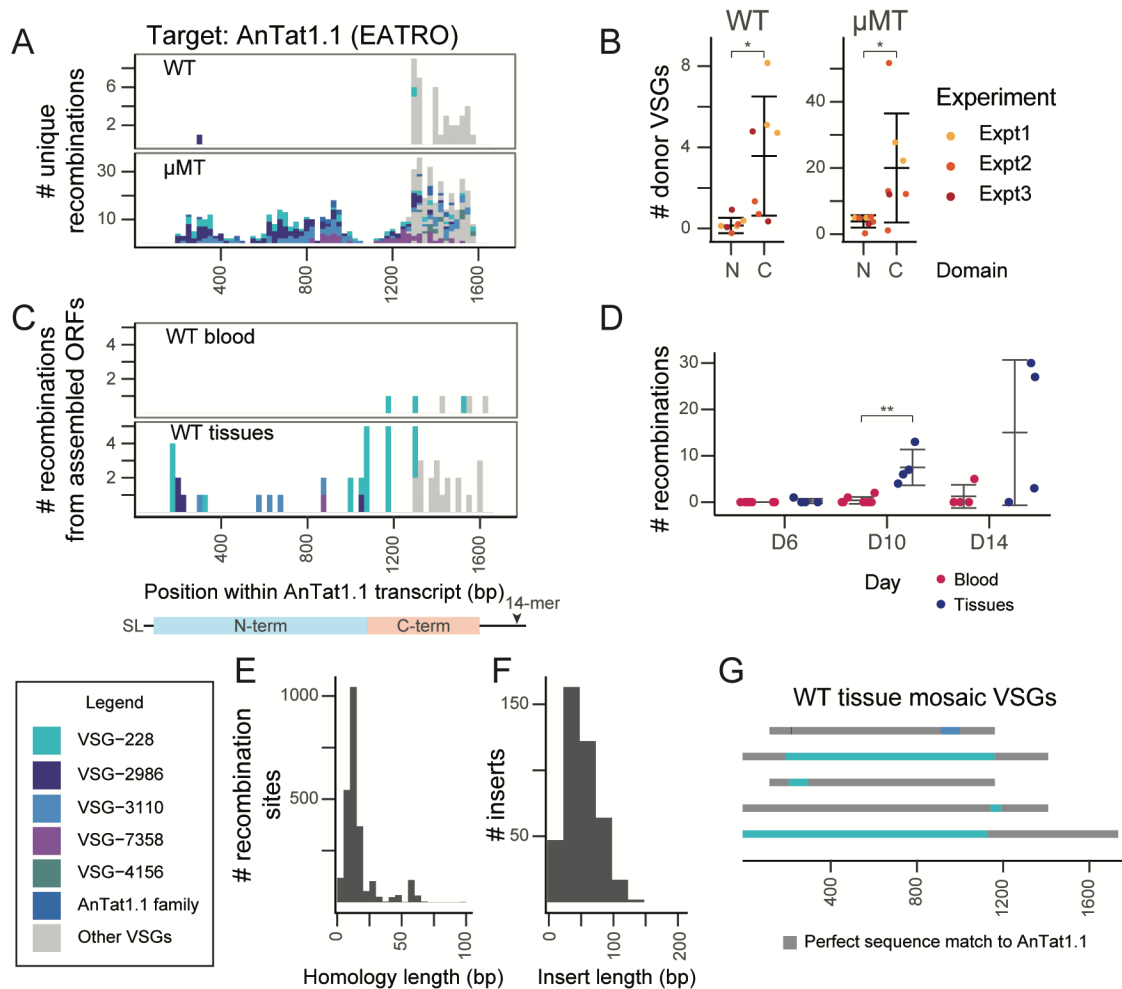

**Figure 4. AnTat1.1 mosaic VSGs form *in vivo* and reside within tissues of WT mice**

A) A histogram of unique recombination events identified in all mice in wildtype or  $\mu$ MT mice from Day 15 post-infection. Recombination events found in multiple mice are represented once. (WT n=7;  $\mu$ MT n=7, from 3 independent experiments) The midpoint of the perfect homology between AnTat1.1 and the donor VSG at the recombination site is plotted. If a donor VSG could not be unambiguously identified, the average recombination position was plotted. B) Quantification of the number of donor VSGs utilized in mosaic recombination events within the N and C terminal domain of AnTat1.1 in wildtype and  $\mu$ MT mice from A). Statistical significance determined by a pairwise Wilcoxon test (\* $p < 0.05$ ) C) A histogram of the mosaic recombination events identified from VSG ORFs assembled in Beaver et al. All recombination events identified are shown at all time points sampled during infection: D6, D10, and D14. If a mosaic recombination event was identified in more than one tissue within the same mouse, it was counted once (n=12, 4 mice per tissue time point). D) Quantification of the mosaic recombination events detected within wildtype mouse blood or tissue. Statistical significance determined by pairwise Wilcoxon within each timepoint. (\*\* $p < 0.01$ ) E) A histogram of the length of the shared identity between AnTat1.1 and the donor VSG at the recombination sites. F) A histogram of donor VSG insertion lengths identified within individual reads. The insert length only includes newly inserted sequence and does not include recombination sites. G) Representative schematics of mosaic VSGs from assembled ORFs in Beaver et al. SL = 5' splice leader cap, 14-mer = 3' sequence conserved in all VSG transcripts

309 **Small changes in the VSG sequence provide substantial antibody evasion**

310

311 Many AnTat1.1-derived mosaic VSGs differ from their original sequence by only a  
312 few amino acids. To determine how these changes impacted the antigenic character of  
313 the mosaic VSGs, we analyzed live parasites expressing AnTat1.1 mosaic derivatives by  
314 flow cytometry using a potent rabbit anti AnTat1.1 polyclonal antibody raised against  
315 purified AnTat1.1 protein (5A). Many of the mutations block about 50% of antibody  
316 binding. Interestingly, three VSG-2986 mosaic clones were isolated with increasing  
317 insertion length (5B). The smallest insertion (18bps, with 3 a.a. changes, Mosaic 2),  
318 appears to account for most of the antigenic change, with only small decreases in binding  
319 associated with each additional length of insertion. We modeled the structure of these  
320 mosaics using ColabFold<sup>22</sup> and their general structures matched AnTat1.1 (5C), except  
321 at the disordered top of the N-terminal lobe. A careful examination of the locations of the  
322 mutations on AnTat1.1 show that mutations from Mosaic 2 which have the largest effect  
323 on antibody binding are at the apex of the structure while other alterations can be found  
324 on the side of the monomer (5D). These results demonstrate that, although the insertions  
325 characteristic of mosaic recombination are quite short, even these small changes to the  
326 VSG can confer large consequences for host antibody binding depending on their  
327 position.

328

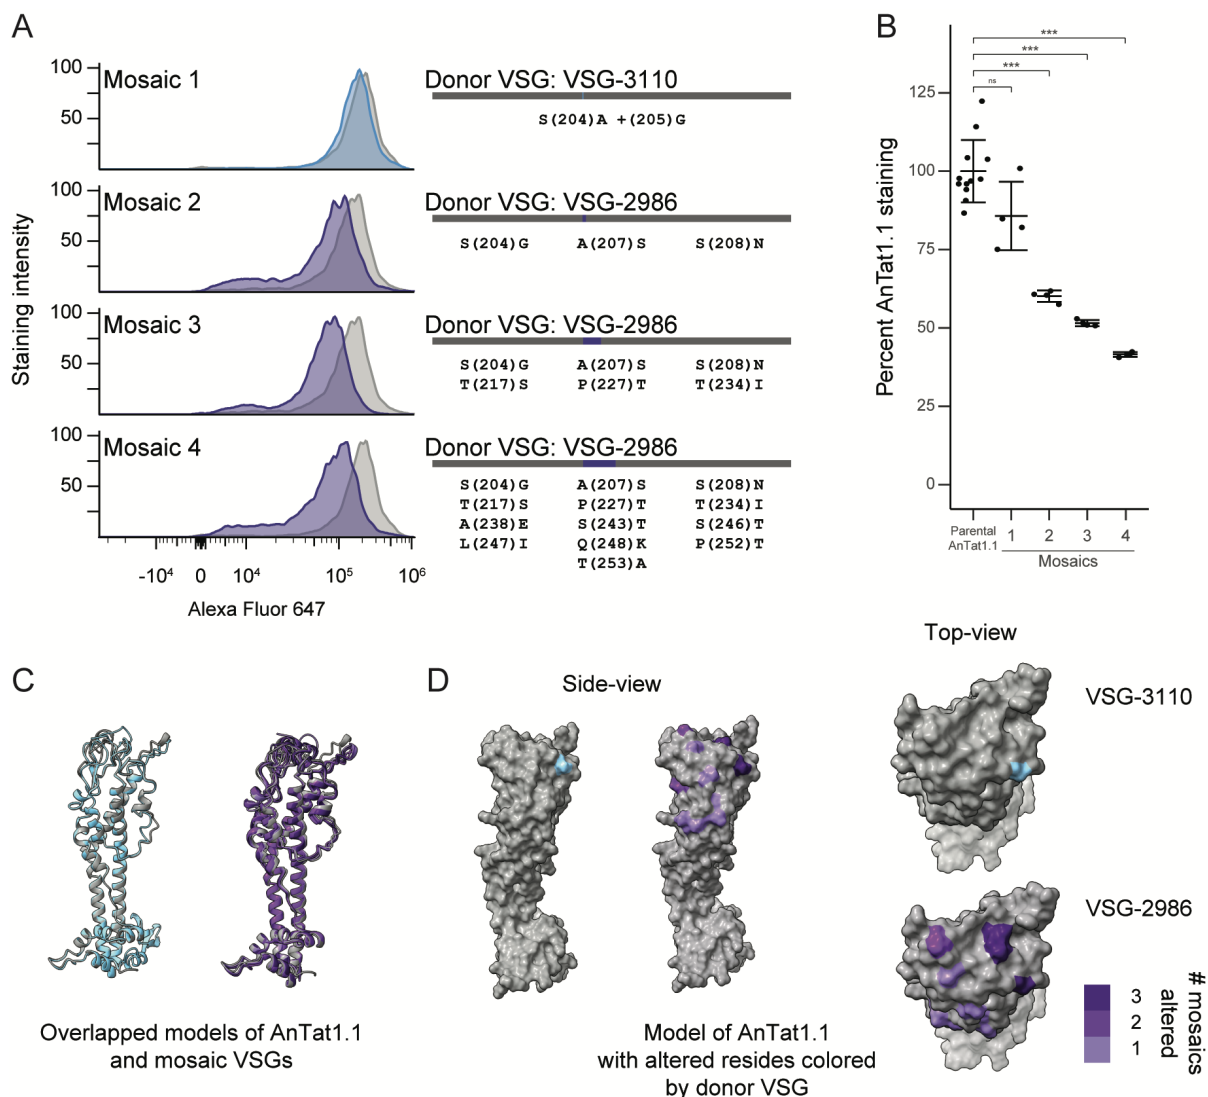

**Figure 5. Mutations within VSG hypervariable region shift antibody binding**

A) A histogram showing the Alexa Fluor 647 staining intensity for parental controls (gray) and mosaic clones colored by donor VSG. (n= 4, from 3 independent parental lineages derived from 2 Cas9 clones) Schematics showing the mosaic VSGs are to the right. Donor VSG and amino acid substitutions are specified. B) Quantification of staining intensity changes for individual clones, based on median staining intensity. The median Alexa Fluor 647 intensities were normalized to the average of the parental clone. Statistical significance was determined based on a one-way ANOVA with a post-hoc Tukey HSD. (\*\*p<0.001) C) Overlapping ribbon structures of AnTat1.1 and Mosaic 1 in blue and AnTat1.1 and Mosaic 2, Mosaic 3, and Mosaic 4 in purple as predicted by ColabFold. D) A space filling model of AnTat1.1 highlighting the changed residues within the monomer. VSG-3110 in blue and VSG-2986 in purple.

## 330 **Discussion**

331

332 Chronic *T. brucei* infection relies on the generation of new VSGs, with novel VSGs  
333 dominating late stages of infection<sup>3,5,6</sup>. However, the new VSGs generated during  
334 infection are complex, possibly arising from several intermediate events, and selected  
335 within a host environment with immunity against numerous previously expressed VSGs.  
336 The inherent complexity of chronic infection thus obscures the underlying biological  
337 principles driving VSG diversification. Here, we demonstrate that VSG diversification can  
338 be induced *in vitro* using Cas9-mediated double-strand DNA breaks within the VSG  
339 coding sequence, reproducibly generating mosaic VSGs that faithfully recapitulate  
340 mosaics formed naturally *in vivo*. By selecting just one VSG and looking at thousands of  
341 recombination outcomes, we have defined patterns characteristic of mosaic  
342 recombination. Mosaic VSGs typically form through short, templated insertions, and  
343 homology drives this process, restricting donor VSGs within the N-terminus to those from  
344 a set of closely related family members. Finally, we demonstrate that mosaic VSGs  
345 provide substantial immune evasion, particularly when these changes occur at the top of  
346 the VSG N-terminus, which may reflect a hypervariable region within the VSG.

347

348 We have shown that DNA breaks, previously shown to drive VSG switching<sup>16,17</sup>,  
349 can also result in VSG diversification through mosaic VSG formation. While the exact  
350 DNA repair mechanism that generates mosaics is unclear, the patterns we observe—  
351 short templated-insertions relying on short stretches of sequence homology—suggest a  
352 mechanism similar to microhomology-mediated end joining (MMEJ). MMEJ is known to  
353 function in *T. brucei* and is typically RAD51-independent<sup>23</sup>. In line with this, there is  
354 evidence for a RAD51-independent pathway capable of driving antigenic variation in the  
355 parasite<sup>24</sup>. If an MMEJ-mediated small insertion occurs following a blunt, double-strand  
356 break, other types of breaks, like 5' or 3' staggered double-strand breaks, may result in  
357 alternative repair outcomes<sup>25</sup>. In B-cells, which use DNA breaks to undergo class  
358 switching and somatic hypermutation, the type of DNA break appears to dictate repair  
359 pathway choice<sup>26,27</sup>. It is thus possible that the N-terminal replacements we observe *in*  
360 *vivo*, but not *in vitro*, originate from multiple breaks, or staggered breaks with single-strand  
361 overhangs, that are repaired through a pathway distinct from the one driving repair of  
362 Cas9-induced breaks *in vitro*.

363

364 While our data suggest most (75%) VSGs in the archive are capable of  
365 diversification through the mechanism we have described, this is not the case for all  
366 VSGs. Indeed, we find that mosaic recombination occurs only if a homologous donor VSG  
367 is available. Most studies of antigenic variation in *T. brucei* have focused on VSG-2, a  
368 unique VSG that does not readily diversify; this may explain, at least in part, why mosaic  
369 recombination has been observed so rarely *in vitro* until now. The proportion of VSGs  
370 within families is surprisingly similar between the EATRO1125 and Lister427 strains.  
371 Perhaps this ratio has evolved to provide a balance between diversification events, which  
372 may not always provide full immune evasion, and switching, which is more likely to  
373 completely escape pre-existing immunity.

374

375 While the members of the AnTat1.1 VSG provide numerous possibilities for

376 recombination and the generation of new VSGs, we found that the center portion of the  
377 gene appears to be especially successful at generating recombinants. We considered  
378 that this might be attributable to available donor sequences or guide efficiency, but there  
379 was nothing apparently unique about this site compared to other break locations. Protein  
380 modeling of AnTat1.1, however, revealed that this region encodes the top of the N-  
381 terminal lobe of the VSG, a site directly exposed to host antibody. For AnTat1.1 and many  
382 similar VSGs<sup>2</sup> (A2-type), this is an unstructured region<sup>28</sup>, and indeed the apex of most  
383 crystalized VSG appears unstructured despite a surprising variety of underlying  
384 structures<sup>28</sup>. We propose that this disordered region may have evolved to be more  
385 tolerant to amino acid changes, allowing diversification within the part of the protein most  
386 likely to facilitate immune evasion. While many recombination events may occur after a  
387 DNA break, we hypothesize that only a few, particularly those within disordered regions,  
388 maintain VSG structural integrity. Since expression of the VSG is essential for cell cycle  
389 progression<sup>29</sup>, it is possible that many newly formed mosaic VSGs lead to cell death for  
390 the parasites, allowing only a subset of the recombination events to survive and resulting  
391 in an apparent increase in recombination within the regions of the VSG where mutation  
392 is most tolerated.

393  
394 Although mosaic insertion events are often small (average ~46 bp) and can result  
395 in few amino acid changes, these small changes, especially within the top of the N-  
396 terminal lobe, confer substantial immune evasion. Just three amino acid substitutions,  
397 from an 18 bp templated replacement, block approximately 50% antibody binding from a  
398 potent polyclonal antiserum. While we have shown that these recombination events can  
399 result in dramatic antigenic changes, many are also likely to result in incomplete immune  
400 evasion. Perhaps as a result, mosaic VSGs derived from AnTat1.1 in WT blood appear  
401 to be mostly N-terminal replacements, where the AnTat1.1 N-terminal domain is  
402 completely replaced. A wider diversity of AnTat1.1-derived mosaics can be observed  
403 within the tissues, however, where AnTat1.1-expressing parasites linger due to  
404 differences in immune pressure<sup>4</sup>. In  $\mu$ MT mice, where AnTat1.1 expressing parasites can  
405 linger indefinitely, this observation is further amplified. We thus hypothesize that  
406 generating new VSGs is an iterative process, where a series of recombination events  
407 progressively shifts the character of a VSG until an immunologically distinct variant is  
408 formed. The relatively “protected” tissue spaces may serve as a site for this iterative  
409 process to occur. Another intriguing possibility is that partial immune evasion is  
410 advantageous for the parasite: a recent study suggested that exposure to sublethal  
411 antibody concentrations can trigger a VSG switch in *T. brucei*<sup>30</sup>. Perhaps parasites  
412 expressing these partially evasive variants are more prone to switching to a completely  
413 new VSG.

414  
415 In addition to shedding light on the selective pressures imposed upon mosaic  
416 variants, our mouse data also demonstrate that our *in vitro* model of antigenic  
417 diversification recapitulates VSG diversification *in vivo*. The recombination events we  
418 detect in  $\mu$ MT mice represent the full breadth of possible recombination events which  
419 AnTat1.1 can form, and these are largely represented within our *in vitro* break-induced  
420 mosaic VSG populations. We observe short insertions flanked by short regions of identity  
421 in both contexts, but the dominance of the 694 break position we observe *in vitro* is not

422 reflected in our *in vivo* analysis. This could be for a variety of reasons, including non-  
423 uniform break locations along the VSG *in vivo* or a variety of DNA break types driving a  
424 different pattern of outcomes. Intriguingly, in the absence of an exogenous DNA break,  
425 we do not observe any diversification *in vitro*, while diversification occurs continuously in  
426 the  $\mu$ MT context. This suggests that some aspect of the host environment other than  
427 antibody pressure induces diversification *in vivo*. It remains to be investigated whether an  
428 *in vivo* cue for diversification exists.

429  
430 The diversification mechanisms we have described may also be at play in other  
431 gene families where diversity is critical. Many pathogens express variable antigens, with  
432 the antigenic repertoire stored within subtelomeric regions of the genome where  
433 continuous DNA damage might facilitate diversification. Mosaic antigen genes have been  
434 described in plasmodium var genes<sup>31-34</sup> and giardia variant-specific surface proteins  
435 (VSPs)<sup>35,36</sup>, some of which resemble the small insertion mosaics we have observed here.  
436 Alternative end joining pathways appear to be intact in these organisms<sup>37</sup>, and may  
437 facilitate mosaic formation. Many alternative forms of DNA repair are also conserved in  
438 mammals<sup>38</sup>; it is thus plausible that large gene families like olfactory receptors<sup>39,40</sup> and  
439 protocadherins<sup>39</sup>, which depend upon diversity and are known to swap sequences  
440 through gene conversion events<sup>41-44</sup>, may also be diversifying through similar  
441 mechanisms. A rigorous targeted approach, like we have used here, may be required to  
442 determine the role this mechanism plays in diversification of other gene families.

443  
444 Here we answer long-standing questions about how the *T. brucei* VSG repertoire  
445 evolved to generate new antigens critical for maintaining a chronic infection. Our high-  
446 throughput, sensitive technique has enabled the characterization of thousands of mosaic  
447 diversification events, orders of magnitude more than was previously feasible. This  
448 analysis revealed a pattern of short, homology-driven, and templated insertions around  
449 DNA break sites that can shift the antigenic character of the VSG. More broadly, this study  
450 provides an experimental framework for the hypothesis-driven exploration of antigen  
451 diversification in *T. brucei* as well as in other pathogenic microbes.

452

453 **Methods**

454

455 **Parasites:**

456 Pleiomorphic EATRO1125 AnTat1.1 90-13 *T. brucei* parasites were maintained in  
457 HMI-9 media with 10% heat inactivated FBS and 10% Serum Plus. Parasites were  
458 passaged when they reached approximately  $5 \times 10^5$  cells/mL. Monomorphic Single Marker  
459 Lister427 VSG221 TetR T7RNAP bloodstream form (NR42011; LOT: 61775530)<sup>45</sup>. *T.*  
460 *brucei* were maintained in HMI-9 up to  $1 \times 10^6$  parasites/mL. VSG221 has since been  
461 renamed to VSG-2.

462

463 **Plasmids:**

464 Plasmids were synthesized with Gibson Assembly using the following templates,  
465 when specified. Gibson Assembly master mix was custom made<sup>46</sup>. Whole plasmid  
466 sequencing was performed by Plasmidsaurus using Oxford Nanopore Technology with  
467 custom analysis and annotation.

468

469 pLEW100v5-BSD-FLAG-La-Cas9 was synthesized from pLEW100v5-BSD and  
470 pRPaCas9<sup>47</sup>. A *T. brucei* codon optimized FLAG tag was added to the N-terminus of  
471 Cas9. pLEW100V5-BSD was a gift from George Cross (Addgene plasmid # 27658 ;  
472 <http://n2t.net/addgene:27658> ; RRID:Addgene\_27658). pRPaCa9 was a gift from David  
473 Horn (Addgene plasmid # 111819 ; <http://n2t.net/addgene:111819> ;  
474 RRID:Addgene\_111819).

475

476 pHH-HYG-AnTat1.1 and pHH-HYG-VSG-228 were synthesized from pHH-HYG-  
477 VSG-3-S317A.<sup>48</sup> This was a gift from Joey Verdi. AnTat1.1 sequence was obtained from  
478 AnTat1.1 specific cDNA from mouse infection D6 cloned into a pMiniT vector with the  
479 PCR Cloning Kit (NEB, E1202S). VSG-228 was partially amplified from VSG PCR (see  
480 below) derived from AnTat1.1 depleted D16  $\mu$ MT parasites from blood. The partial  
481 fragment was amplified with an AnTat1.1 family specific forward primer (5' -  
482 ACTACACCCACAACAAGCTCTA-3') and a pan VSG reverse primer which binds to a  
483 conserved 14bp region of the 3' UTR (5'-  
484 GATTTAGGTGACACTATAGTGTTAAAATATATC-3') with AmpliTaq Gold (Applied  
485 Biosystems, 4398881) (anneal & extension 60C 1m, 35 cycles). The resulting PCR was  
486 cloned into the pMiniT backbone and the remainder of VSG-228 was *de novo* synthesized  
487 with Gibson Assembly.

488

489 The pT7sgRNA plasmids were obtained according to Rico et al<sup>47</sup>. Briefly, sticky-  
490 end annealed sgRNAs were ligated into a BbsI-HF (NEB, R0539S) digestion of  
491 pT7sgRNA. Supplemental Table 1 contains the sequences for the annealed guides.  
492 pT7sgRNA was a gift from David Horn. (Addgene plasmid # 111820 ;  
493 <http://n2t.net/addgene:111820> ; RRID:Addgene\_111820)

494

495 **Transgenic parasites:**

496 To obtain all transgenic parasites, 5 million parasites were electroporated with 5-  
497 10ug of digested plasmid with an AMAXA Nucleofector II using X-001 in Human T-cell  
498 Nucleofector Solution (Lonza VPA-1002).



499 For tetracycline-inducible Cas9 parasites, EATRO1125 or Lister427 parasites  
500 were electroporated with pLEW100v5-BSD-FLAG-La-Cas9, digested with NotI-HF (NEB,  
501 R3189S). Parasites were immediately selected in 5ug/mL Blasticidin (Thermo Scientific,  
502 R21001) and maintained in selection unless otherwise specified.

503 To obtain AnTat1.1 and VSG-228 expressing Lister427 parasites, Lister427  
504 parasites were electroporated with pHH-HYG-VSG plasmids digested with BamHI-HF  
505 (NEB, R3136S). After 16-24 hours recovery, 25ug/mL of hygromycin (Fisher Scientific,  
506 J67371-XF) was added to the culture. After obtaining colonies 5-7 days later, selection  
507 was reduced to 5ug/mL and maintained unless otherwise specified.

508 Lister427 parasites with pLEW100v5-BSD-FLAG-La-Cas9 inserted were  
509 additionally electroporated with pHH-HYG-VSG plasmids expressing Antat1.1. Clones  
510 were obtained as above.

511 To obtain constitutive guide expressing parasite lines, parasites were  
512 electroporated with pT7sgRNA guide containing plasmids digested with NotI-HF<sup>47</sup>. After  
513 16-24 hours recovery, single colonies of parasites were selected with 2ug/mL phleomycin  
514 (Sigma-Aldrich, SML3001). Parasites were maintained without phleomycin selection.

515

#### 516 **T7-Guide Synthesis & Purification:**

517 DNA fragments containing a T7 promoter and guide RNA sequence were  
518 synthesized as described previously<sup>49</sup>. Briefly, T7-guide primers and a G00 primer were  
519 amplified with Phusion polymerase for 35 cycles (annealing temp 60C, extension 5s).  
520 PCR products from 12 identical PCRs were pooled and purified via ethanol precipitation.

521

#### 522 **Cas9 Transient Electroporations:**

523 Approximately 24 hours prior to electroporation, in a single flask, 1 million parasites  
524 in 12mLs of media per sample was seeded and induced with 1ug/mL doxycycline  
525 (Millipore Sigma, D9891-1G). Only blasticidin selection (Cas9) was maintained and for  
526 Lister427 parasites expressing AnTat1.1, hygromycin (active VSG expression) was  
527 removed at this stage. Either 8mLs (Lister427) or 10mLs (EATRO1125) of parasites was  
528 spun down, media removed, and parasites were resuspended in 100uL Human T-cell  
529 Nucleofector Solution. Each sample was electroporated using the X-001 program on the  
530 AMAXA Nucleofector II with approximately 1-1.5ug of purified T7-guide in a volume less  
531 than 10uL or a sample without any DNA as a negative control. Parasites were moved into  
532 5mLs HMI-9 in 6-well plates to recover for 30 minutes then moved into 20mLs total in  
533 flasks to recover overnight. About 24 hours after electroporation, parasites were counted  
534 and split. For EATRO1125, 12 million cells (or all the cells if there were fewer than  
535 12million) were seeded into 60mLs total with blasticidin. For Lister427, 2 million cells were  
536 seeded into 20mLs total with blasticidin. At the 48 hour time point, parasites were counted,  
537 collected, and stored in TRIzol (Invitrogen, 15596026) for subsequent RNA extraction.

538

#### 539 **Isolation of mosaic expressing parasites:**

540 Multiple clones of parasites expressing T7sgRNA with guides were derived from  
541 two distinct inducible Cas9-expressing parasite clones. Dilutions of parasites were plated  
542 in 96-well plates in 5ug/mL blasticidin and 1ug/mL doxycycline. Individual clones were  
543 visible after 7-14 days. Upon isolation of a parasite clone, all drugs were removed.  
544 Parasites were analyzed by flow cytometry. VSG sequences for clones were determined

545 from extracted RNA. cDNA was synthesized using the Superscript III Reverse  
546 Transcriptase (Invitrogen, 18080051) and a VSG-specific primer which binds to a  
547 conserved 14-bp sequence within the 3' UTR. (5'-GTGTTAAAATATATC-3'). 2uL of  
548 RNase-treated cDNA was amplified for 35 cycles with VSG specific primers: a spliced-  
549 leader (5'-ACAGTTTCTGTAATATTG-3') and SP6-VSG 14-mer (5'-  
550 GATTTAGGTGACACTATAGTGTTAAAATATATC-3') using Phusion polymerase  
551 (Thermo Fisher, F530L) (annealing temp 55C, extension 45s). PCR products were  
552 cleaned using the Monarch PCR & DNA cleanup kit (NEB, T1030L). VSG sequences  
553 were determined by amplicon nanopore sequencing performed by Plasmidsaurus using  
554 Oxford Nanopore Technology with custom analysis and annotation or Sanger sequencing  
555 with the sequencing primer (5'- AGAGAATACTAAGCTAGTTGGC-3') performed by  
556 Azenta Life Sciences.

557

### 558 **Mouse Infections:**

559 C57BL/6 mice and  $\mu$ MT<sup>-</sup> (B6.129S2-Ighm<sup>tm1Cgn/J</sup>)<sup>21</sup> mice were delivered at 8  
560 weeks old from Jackson Labs. Approximately 5 EATRO1125 parasites were injected into  
561 mice intravenously through the tail vein. These parasites express either AnTat1.1 or VSG-  
562 421. Starting at D4 post-infection, parasitemia was monitored within mice every two days  
563 via tail bleed. Blood was harvested at D6 post-infection through a submandibular bleed.  
564 An additional gel pack and in-cage food pellets were provided to mice during recovery  
565 since it helped  $\mu$ MT mice survive the blood loss. At D15, post-infection, mice were  
566 humanely euthanized with ketamine injection and blood was harvested through cardiac  
567 puncture. Blood was stored in TRIzol LS (Invitrogen, 10296028) for RNA extraction.  
568

### 569 **RNA preparation:**

570 Parasites were stored in TRIzol prior to RNA extraction. Blood with parasites was  
571 stored in TRIzol LS. RNA was extracted via phenol/chloroform extraction according to the  
572 manufacturers protocol. Purified RNA was DNase treated with Turbo Dnase (Thermo  
573 Fisher, AM2239) and purified with 1.8X Mag-Bind TotalPure NGS Beads (Omega Bio-  
574 tek, M1378-01). Verification of effective DNase treatment was performed via PCR of  
575 Hygromycin (EATRO1125 only) (Fwd: 5'-ACAGCGGTCATTGACTGGAG-3'; Rev: 5'-  
576 ATTTGTGTACGCCCGACAGT-3', annealing temp 52C, extension 30s) or HSP70  
577 (Lister427 & EATRO1125) (Fwd: 5'-AGAACACTATCAATGACCCCAAC-3'; Rev: 5'-  
578 CCATGCCCTGGTACATCT-3', annealing temp 50C, extension 15s) genes for 30 cycles  
579 using OneTaq DNA Polymerase (NEB, M0480L).  
580

### 581 **VSG-seq:**

582 VSG-seq was performed as described elsewhere<sup>3,4</sup>. Briefly, cDNA was  
583 synthesized using the Superscript III Reverse Transcriptase and a VSG-specific primer  
584 which binds to a conserved 14-bp sequence within the 3' UTR. (5'-GTGTTAAAATATATC-  
585 3'). cDNA was treated with Rnase A (Quiagen, 19101) and RNase H (Invitrogen,  
586 18080051) for 30 minutes then purified with 1.8X Mag-Bind Total NGS Beads (Omega  
587 Bio-tek, M1378-01). Purified cDNA was amplified for 25 cycles with VSG specific primers:  
588 a spliced-leader (5'-ACAGTTTCTGTAATATTG-3') and SP6-VSG 14-mer (5'-  
589 GATTTAGGTGACACTATAGTGTTAAAATATATC-3') using Phusion polymerase  
590 (Thermo Scientific, F530L) (annealing temp 55C, extension 45s). This PCR product was

591 prepared for sequencing using the Nextera XT DNA Sample Prep Kit (Illumina, FC-131-  
592 1096) according to the manufacturer's instructions. Libraries were sequenced with 100  
593 bp single-end reads on a NovaSeq6000. Analysis was performed using the  
594 VSGSeqPipeline found at [github.com/mugnierlab](https://github.com/mugnierlab).

595

#### 596 **VSG-AMP-seq library preparation:**

597 VSG-AMP-seq was based upon AMP-seq<sup>50</sup> and GUIDE-seq<sup>51</sup>. cDNA was  
598 synthesized from DNA-free RNA using Superscript III Reverse Transcriptase and a VSG-  
599 specific primer which binds to a conserved 14-bp sequence within the 3' UTR. (5'-  
600 GTGTAAAATATATC-3'). Second Strand synthesis was performed with NEBNext  
601 mRNA Second Strand Synthesis Module (E6111L). The resulting double stranded cDNA  
602 was purified with purified with 1.8X Mag-Bind Total NGS Beads. cDNA was fragmented  
603 briefly with NEBNext dsDNA Fragmentase (M0348L) for ten minutes at 37C to obtain  
604 fragments of approximately 500bps. Fragments were purified with a double-sided Mag-  
605 bind bead cleanup. First, fragments were incubated with 0.5X beads, DNA bound to the  
606 beads were discarded and an equal volume of beads as before, then a 1X PEG  
607 concentration, was added to the fragments and the cleanup proceeded as normal.  
608 Fragments were end-repaired with Enzymatics low concentration end repair mix (Y9140-  
609 LC-L) and A-tailed with Recombinant Taq (Life Technologies, 100021276). Y-Adapters  
610 were pre-annealed by incubating a MiSeq Common Adapter with Adapters (A01-A10)  
611 containing 25 bp Unique Molecular Indexes (UMIs) and a barcode at 10uM at 95C for 1  
612 sec, 60C for 1s, and slowly cooled to 4C. Adapters were ligated to the A-tailed fragments  
613 with T4 DNA Ligase (Enzymatics L6030-LC-L). The resulting fragments were cleaned up  
614 with 0.8X Mag-Bind beads. Two target specific PCRs were performed on the fragments  
615 with pools of target specific primers, one in the forward and one in the reverse direction.  
616 All primers are listed in Supplemental Table 1. Target primers have spacers of varying  
617 lengths to generate sequence diversity without the need for PhiX. Target specific primers  
618 are paired with P5\_2 and a sample specific P primer (P701-P710) which contains a  
619 second barcode. Fragments are amplified with Platinum Taq (Life Technologies,  
620 10966018) using the following program: 95C 5 mins, 35 cycles of 95C for 30s, 55C for  
621 30s, and 72C for 30s, and 72 for 5 mins. The resulting products were cleaned up with  
622 0.6X Mag-bind beads. Libraries were quantified using the Qubit dsDNA HS Kit (Life  
623 Technologies, Q32854) and run on a 1% agarose gel to determine average length.  
624 Libraries were sequenced on a MiSeq or for deep sequencing of  $\mu$ MT samples on a  
625 NovaSeq6000 with custom index1 and read2 primers using the following cycle conditions:  
626 "151|8|33|131" with the paired-end Nextera sequencing protocol.

627

#### 628 **VSG-AMP-seq analysis:**

629 Index sequences were added to the names of sequencing reads. FASTQ files were  
630 demultiplexed by target specific primer using cutadapt v=3.5<sup>1</sup> searching for multiple  
631 target-specific primers at the 5' end of read2 in paired-end mode using flags --  
632 action=retain --overlap 10. Then, reads were quality trimmed with trim\_galore v0.6.4\_dev  
633 ([github.com/FelixKrueger/TrimGalore](https://github.com/FelixKrueger/TrimGalore)) where adapter sequences, if present, were  
634 removed with flags --dont\_gzip --paired --trim1. Spacers were removed from read1 if  
635 present using cutadapt by searching for the target-specific primer sequence at the 3' end  
636 of the read with flags --action=retain --overlap 10. Dual-indexed barcodes were used to

637 demultiplex reads. Mismatch allowed was determined by the barcodes present, so that a  
638 unique barcode could still be identified.

639  
640 To consolidate reads, UMIs were extracted from large FASTQ files, split into  
641 smaller files and grouped by 100% identity using cd-hit-est v4.8.1<sup>53,54</sup> with flags -c 1.0 -n  
642 8 -M 16000 -d 0. UMIs were then grouped by 92% using flags -c 0.92 -n 8 -M 16000 -d 0.  
643 Reads were sorted into consensus groups based on UMIs and a consensus sequence  
644 was formed as the most popular base at each position of the read with a threshold quality  
645 score of at least 2. If there was a tie, an N was used. Clusters with fewer than 3 reads  
646 were removed.

647  
648 The full sequence length of the AnTat1.1 transcript was determined by  
649 Plasmidsaurus using Oxford Nanopore Technology with custom analysis and annotation  
650 and the 5'-end was appended with alternative splicing information from control samples.  
651 The positions were 0 indexed. Read2, the anchored read, was aligned to AnTat1.1. Read  
652 pairs were removed if: the first 4/10 bases after the primer did not align to AnTat1.1, an  
653 alternative VSG which contained the primer sequence was amplified, the wrong position  
654 of AnTat1.1 was amplified by the anchor, if the reads were too short (<15 bps), contained  
655 too many Ns (>5), if there was an inversion event or a duplication, or if the transcript was  
656 alternatively spliced. Read1, the unanchored read, was also aligned to AnTat1.1 with a  
657 mismatch of up to 1bp. If no alignment could be found, read1 was trimmed to remove  
658 AnTat1.1 like sequences from the 5' and 3' ends, allowing up to 1 mismatch on each end  
659 to be removed, leaving a fragment which can be used to search the VSGnome and  
660 identify potential donor VSGs. A consensus sequence was generated from the reads, if  
661 they overlapped, using their alignment positions within AnTa1.1. AnTat1.1, the consensus  
662 read, and putative donor VSG were aligned, and recombination sites were identified. If  
663 no consensus could be generated, read1 was used. Ambiguous recombination sites  
664 where a single donor could not be identified were represented by the average position of  
665 the potential recombination sites and identified as ambiguous.

666  
667 **VSG Clustering and family identification:**

668 FASTA files of genes encoding VSGs from the Lister427 strain were derived from  
669 TrypsRU (vsgs\_tb427\_all\_atleast150aas\_cds.txt, vsgs\_tb427\_  
670 nodups\_atleast250aas\_cds.txt, vsgs\_tb427\_nodups\_atleast250aas\_cdsplusflanks.txt)  
671 (George Cross) and TriTrypDB<sup>55</sup> (TriTrypDB-65 Lister Strain 427 2018)<sup>20</sup>. A combined  
672 master FASTA file was standardized to include important attributes as part of the  
673 sequence name (VSG name, GB Accession Code, Nucleotide Length, Status of  
674 Sequencing, Chromosomal Location, Source, Parasite Line (Lister427), and any other  
675 Extra Information) and the corresponding sequence. From the 2018 genome, the genes  
676 encoding for VSGs were isolated by looking for the keywords, "variant" or "VSG" in the  
677 description attribute. The genomic sequence for these VSG genes was extracted from  
678 the Genome file and included 300 bp of flanking sequence up and downstream for further  
679 analysis. Identical VSGs were clustered using cd-hit-est, with the following flags: -c 1.0 -  
680 n 8 -M 16000 -d 0. A representative sequence, usually from the 2018 genome with the  
681 flanking sequences, was selected for each VSG and was the longest sequence available.  
682 Duplicate VSGs identified at two different chromosomal locations within the 2018 genome

683 were added to the file to represent all known Lister427 VSGs. AnTat1.1 was added to the  
684 master Lister427 VSG file for further analysis.

685 EATRO1125 VSGs were obtained from TrypsRU (George Cross) and included 200  
686 bp flanking sequences. (vsgrs\_tb1125\_all\_atleast150aas\_cdsplusflanks.txt)

687  
688 Multiple sequence alignment was performed using MAFFT<sup>56</sup>, using the following  
689 flags: --auto --reorder. Following multiple sequence alignment, a phylogenetic tree was  
690 constructed using a generalized time reversible mode in FastTree<sup>57,58</sup> with the following  
691 flags: -nt -gtr. Clustering of AnTat1.1 and its family members was used to identify a  
692 threshold genetic distance to generate subsequent subtrees. Threshold distances of  
693 0.24659 and 0.21677 were used for EATRO1125 and Lister427, respectively. Down  
694 sampling and subtree generation of representative sequences was performed using  
695 PARNAS (0.1.4)<sup>59</sup>. The command used for PARNAS included flag: --cover --radius  
696 <threshold distance>. From the subtree generated, the number of unique VSGs and the  
697 number of VSG families were identified. Duplicate VSGs from the Lister427 genome were  
698 analyzed to determine if they were within a group that lacked any diversification.

#### 699 700 **Western Blotting:**

701 5 million parasites were spun down and washed with 25C PBS. Then, pelleted  
702 parasites were resuspended in 50uL RIPA buffer (50mM Tris, 150mM NaCl, 1% NP-40,  
703 0.5% Sodium Deoxycholate, 0.1% SDS, pH = 7.4) + 2X Laemmli buffer. Lysed parasites  
704 were boiled at 95C for 5 minutes. 5uL of lysates were separated on a Tris-glycine  
705 polyacrylamide gel at 110V for 100 minutes in Tris/glycine running buffer (25mM Tris,  
706 192mM glycine, 0.1% SDS, pH = 8.3). Proteins were then transferred onto a nitrocellulose  
707 membrane using transfer buffer (25mM Tris, 192mM glycine, 20% methanol) overnight at  
708 a 60mAmps per transfer box at 25C. For Cas9 (1:1000) and EF1 $\alpha$  (1:1000), lysates were  
709 separated on 10% polyacrylamide gels and transferred onto 0.45um membranes. For  $\gamma$ -  
710 H2A (1:200), lysates were separated on a 15% polyacrylamide gel and transferred onto  
711 a 0.2um membrane. After transfer, blots were blocked with 0.5% BSA in TBS with 0.05%  
712 Triton X-100 (TBST, 20mM Tris, 150mM NaCl, pH = 7.6) for an hour at RT under constant  
713 agitation. Blots were incubated with primary antibody (see above dilutions) for 2 hours at  
714 25C. After 5 TBST washes, blots were stained for 1 hour with goat anti mouse (1:5000,  
715 Cell Signaling, 7076S) or goat anti rabbit-HRP-conjugated secondary (1:5000, Cell  
716 Signaling, 7074S). After another 5 washes, blots were incubated with ECL (Cytiva,  
717 RPN2109) and film was exposed to blots in a dark room. Developed film was scanned  
718 and images were processed with FIJI<sup>60</sup>. Primary antibodies used were m anti FLAG (M2  
719 clone) (Millipore Sigma, F3165-1MG), m anti EF1 $\alpha$  (CBP-KK1 clone) (Millipore Sigma,  
720 05-235), and rb anti  $\gamma$ -H2A was a kind gift from Galadriel Hovel-miner based upon Glover  
721 and Horn<sup>61</sup>.

#### 722 723 **Flow Cytometry:**

724 In 96 well plates, 200,000 parasites were stained with 1:20,000 rabbit anti  
725 AnTat1.1 primary antibody (Jay Bangs) for ten minutes at 4C while shaking in PBS +  
726 10mg/mL glucose. Parasites were washed once with 100uL PBS + glucose. Then,  
727 parasites were stained with Alexa Fluor 647-conjugated goat anti rabbit IgG (H +L),  
728 F(ab')<sub>2</sub> Fragment (Cell Signaling, 4414S) at 1:1000 at 4C while shaking in PBS + glucose.

729 After washing again with 100uL PBS + glucose, parasites were resuspended in PBS +  
730 glucose + 1:20 Propidium Iodide (BD Biosciences, 556463) and analyzed on a Attune Nxt  
731 flow cytometer (Invitrogen). Data analysis was performed using FlowJo v10.

732

### 733 **Analysis and Modeling of VSG N-terminal Domains:**

734 Full length protein coding sequences from AnTat1.1 and its isolated mosaics were  
735 used for structural modeling. Only N-terminal domain sequences were used for protein  
736 structural prediction since this region of the VSG is the most well-defined experimentally.  
737 Signal peptides are cleaved from the mature VSG during processing, so we used SignalP  
738 6.0<sup>62</sup> to predict and remove the Sec/SPI sequence (--organism eukarya, --mode fast)  
739 resulting in a FASTA file of mature proteins. To determine the coordinate of the N-terminal  
740 domain, we used a python analysis pipeline available at  
741 ([https://github.com/mugnierlab/find\\_VSG\\_Ndomains](https://github.com/mugnierlab/find_VSG_Ndomains)). The script identifies the  
742 boundaries of the VSG N-terminal domain using the HMMscan function under HMMer  
743 version 3.1b2<sup>63</sup>. Query sequences are searched against an HMM profile containing 735  
744 known N-terminal domain sequences from Cross et al<sup>2</sup>. and N-terminal domains defined  
745 by the largest envelope domain coordinate that meets E value threshold ( $1 \times 10^{-5}$ , -domE  
746 0.00001). The processed FASTA file containing only mature VSG N-terminal domain  
747 sequences was used as input for structural prediction of monomers using  
748 LocalColabFold<sup>22</sup> function colabfold\_batch run using the following arguments: --amber, -  
749 -templates, --num\_recycle 3. The best ranked output model with the highest average  
750 predicted local distance test score (pLDDT), that is the highest confidence model, was  
751 used for downstream analyses. Model visualization and alignment were performed using  
752 with UCSF ChimeraX version 1.7.1<sup>64</sup>, developed by the Resource for Biocomputing,  
753 Visualization, and Informatics at the University of California, San Francisco, with support  
754 from National Institutes of Health R01-GM129325 and the Office of Cyber Infrastructure  
755 and Computational Biology, National Institute of Allergy and Infectious Diseases.

756

### 757 **Acknowledgements**

758

759 We would like to thank Jay Bangs for generating and sending us primary rabbit  
760 anti-AnTat1.1 polyclonal antibody. Thanks to Galadriel Hovel-miner for the primary rabbit  
761 anti- $\gamma$ -H2A antibody. We appreciate members of the Mugnier lab for their thoughtful  
762 review of this manuscript, particularly Carolina Duque and Sneider Gutierrez. We also  
763 would like to thank Richard McCulloch for thoughtful feedback about this manuscript. We  
764 would like to thank David Mohr and the JHU GCRF Genomics Core for sequencing  
765 services. Thanks to Joey Verdi for pHH-HYG-VSG-3-S317A and advice about the  
766 generation of transgenic parasites. Data analysis was carried out at the Advanced  
767 Research Computing at Hopkins (ARCH) core facility (rockfish.jhu.edu), which is  
768 supported by the National Science Foundation (NSF) grant number OAC 1920103. This  
769 work was supported by the JHU Catalyst Award. JES, JMCH, AKB, JS, BZ, and MRM  
770 were supported by Office of the Director, NIH (DP5OD023065). JES and JS were  
771 additionally supported NIH training grant T32GM007 and JES was supported by the  
772 National Science Foundation (NSF) Graduate Research Fellowship under grant numbers  
773 1232825 and 1746891. JMCH, AKB, JS and EHA were additionally supported by NIH  
774 T32AI007417.

775 **References**

- 776 1. Hertz-Fowler, C. *et al.* Telomeric Expression Sites Are Highly Conserved in  
777 *Trypanosoma brucei*. *PLoS ONE* **3**, e3527 (2008).
- 778 2. Cross, G. A. M., Kim, H.-S. & Wickstead, B. Capturing the variant surface  
779 glycoprotein repertoire (the VSGnome) of *Trypanosoma brucei* Lister 427. *Mol.*  
780 *Biochem. Parasitol.* **195**, 59–73 (2014).
- 781 3. Mugnier, M. R., Cross, G. A. M. & Papavasiliou, F. N. The in vivo dynamics of  
782 antigenic variation in *Trypanosoma brucei*. *Science* **347**, 1470–1473 (2015).
- 783 4. Beaver, A. *et al.* Extravascular spaces are reservoirs of antigenic diversity in  
784 *Trypanosoma brucei* infection. *bioRxiv* (2022)  
785 doi:<https://doi.org/10.1101/2022.06.27.497797>.
- 786 5. Hall, J. P. J., Wang, H. & Barry, J. D. Mosaic VSGs and the Scale of *Trypanosoma*  
787 *brucei* Antigenic Variation. *PLoS Pathog.* **9**, e1003502 (2013).
- 788 6. Roth, C., Bringaud, F., Layden, R. E., Baltz, T. & Eisen, H. Active late-appearing  
789 variable surface antigen genes in *Trypanosoma equiperdum* are constructed entirely  
790 from pseudogenes. *Proc. Natl. Acad. Sci.* **86**, 9375–9379 (1989).
- 791 7. So, J. *et al.* VSGs Expressed during Natural *T. b. gambiense* Infection Exhibit  
792 Extensive Sequence Divergence and a Subspecies-Specific Bias towards Type B N-  
793 Terminal Domains. *mBio* **13**, e02553-22 (2022).
- 794 8. Pays, E. *et al.* Gene conversion as a mechanism for antigenic variation in  
795 *Trypanosomes*. *Cell* **34**, 371–381 (1983).
- 796 9. Baltz, T. *et al.* Exposed epitopes on a *Trypanosoma equiperdum* variant surface  
797 glycoprotein altered by point mutations. *EMBO J.* **10**, 1653–1659 (1991).
- 798 10. Kamper, S. M. & Barbet, A. F. Surface epitope variation via mosaic gene formation  
799 is potential key to long-term survival of *Trypanosoma brucei*. *Mol. Biochem.*  
800 *Parasitol.* **53**, 33–44 (1992).
- 801 11. Thon, G., Baltz, T. & Eisen, H. Antigenic diversity by the recombination of  
802 pseudogenes. *Genes Dev.* **3**, 1247–1254 (1989).
- 803 12. Lu, Y., Hall, T., Gay, L. S. & Donelson, J. E. Point mutations are associated with a  
804 gene duplication leading to the bloodstream reexpression of a trypanosome  
805 metacyclic VSG. *Cell* **72**, 397–406 (1993).
- 806 13. Rice-Ficht, A. C., Chen, K. K. & Donelson, J. E. Point mutations during generation of  
807 expression-linked extra copy of trypanosome surface glycoprotein gene. *Nature* **298**,  
808 676–679 (1982).
- 809 14. Lu, Y., Alarcon, C. M., Hall, T., Reddy, L. V. & Donelson, J. E. A strand bias occurs  
810 in point mutations associated with variant surface glycoprotein gene conversion in  
811 *Trypanosoma rhodesiense*. **14**, 10 (1994).
- 812 15. Berriman, M. *et al.* The architecture of variant surface glycoprotein gene expression  
813 sites in *Trypanosoma brucei*. *Mol. Biochem. Parasitol.* **122**, 131–140 (2002).
- 814 16. Boothroyd, C. E. *et al.* A yeast-endonuclease-generated DNA break induces  
815 antigenic switching in *Trypanosoma brucei*. *Nature* **459**, 278–281 (2009).
- 816 17. Glover, L., Alford, S. & Horn, D. DNA Break Site at Fragile Subtelomeres  
817 Determines Probability and Mechanism of Antigenic Variation in African  
818 *Trypanosomes*. *PLoS Pathog.* **9**, e1003260 (2013).

- 819 18. Kou, R. *et al.* Benefits and Challenges with Applying Unique Molecular Identifiers in  
820 Next Generation Sequencing to Detect Low Frequency Mutations. *PLOS ONE* **11**,  
821 e0146638 (2016).
- 822 19. Kanagawa, T. Bias and artifacts in multitemplate polymerase chain reactions (PCR).  
823 *J. Biosci. Bioeng.* **96**, 317–323 (2003).
- 824 20. Müller, L. S. M. *et al.* Genome organization and DNA accessibility control antigenic  
825 variation in trypanosomes. *Nature* **563**, 121–125 (2018).
- 826 21. Kitamura, D., Roes, J., Kühn, R. & Rajewsky, K. A B cell-deficient mouse by  
827 targeted disruption of the membrane exon of the immunoglobulin  $\mu$  chain gene.  
828 *Nature* **350**, 423–426 (1991).
- 829 22. Mirdita, M. *et al.* ColabFold: making protein folding accessible to all. *Nat. Methods*  
830 **19**, 679–682 (2022).
- 831 23. Glover, L., Jun, J. & Horn, D. Microhomology-mediated deletion and gene  
832 conversion in African trypanosomes. *Nucleic Acids Res.* **39**, 1372–1380 (2011).
- 833 24. McCulloch, R. & Barry, J. D. A role for RAD51 and homologous recombination in  
834 *Trypanosoma brucei* antigenic variation. *Genes Dev.* **13**, 2875–2888 (1999).
- 835 25. Scully, R., Panday, A., Elango, R. & Willis, N. A. DNA double-strand break repair-  
836 pathway choice in somatic mammalian cells. *Nat. Rev. Mol. Cell Biol.* **20**, 698–714  
837 (2019).
- 838 26. Ling, A. K. *et al.* Double-stranded DNA break polarity skews repair pathway choice  
839 during intrachromosomal and interchromosomal recombination. *Proc. Natl. Acad.*  
840 *Sci.* **115**, 2800–2805 (2018).
- 841 27. So, C. C. & Martin, A. DSB structure impacts DNA recombination leading to class  
842 switching and chromosomal translocations in human B cells. *PLOS Genet.* **15**,  
843 e1008101 (2019).
- 844 28. Đaković, S. *et al.* A structural classification of the variant surface glycoproteins of the  
845 African trypanosome. *PLoS Negl. Trop. Dis.* **17**, e0011621 (2023).
- 846 29. Sheader, K. *et al.* Variant surface glycoprotein RNA interference triggers a  
847 precytokinesis cell cycle arrest in African trypanosomes. *Proc. Natl. Acad. Sci.* **102**,  
848 8716–8721 (2005).
- 849 30. Tenaglia, A. H. *et al.* *Antibodies to Protozoan Variable Surface Antigens Induce*  
850 *Antigenic Variation*. <http://biorxiv.org/lookup/doi/10.1101/2022.06.21.497077> (2022)  
851 doi:10.1101/2022.06.21.497077.
- 852 31. Zhang, X. *et al.* Rapid antigen diversification through mitotic recombination in the  
853 human malaria parasite *Plasmodium falciparum*. *PLOS Biol.* **17**, e3000271 (2019).
- 854 32. Bopp, S. E. R. *et al.* Mitotic Evolution of *Plasmodium falciparum* Shows a Stable  
855 Core Genome but Recombination in Antigen Families. *PLoS Genet.* **9**, e1003293  
856 (2013).
- 857 33. Claessens, A. *et al.* Generation of Antigenic Diversity in *Plasmodium falciparum* by  
858 Structured Rearrangement of Var Genes During Mitosis. *PLoS Genet.* **10**, e1004812  
859 (2014).
- 860 34. Bull, P. C. *et al.* *Plasmodium falciparum* antigenic variation. Mapping mosaic var  
861 gene sequences onto a network of shared, highly polymorphic sequence blocks.  
862 *Mol. Microbiol.* **68**, 1519–1534 (2008).
- 863 35. Yang, Y. & Adam, R. D. A group of *Giardia lamblia* variant-specific surface protein  
864 (VP) genes with nearly identical 5' regions. *Mol. Biochem. Parasitol.* (1995).



- 865 36. Adam, R. D. *et al.* The Giardia lamblia vsp gene repertoire: characteristics, genomic  
866 organization, and evolution. *BMC Genomics* **11**, 424 (2010).
- 867 37. Nenarokova, A. *et al.* Causes and Effects of Loss of Classical Nonhomologous End  
868 Joining Pathway in Parasitic Eukaryotes. *mBio* **10**, e01541-19 (2019).
- 869 38. Schimmel, J., van Schendel, R., den Dunnen, J. T. & Tijsterman, M. Templated  
870 Insertions: A Smoking Gun for Polymerase Theta-Mediated End Joining. *Trends*  
871 *Genet.* **35**, 632–644 (2019).
- 872 39. Williams, D. L. *et al.* May the Odds Be Ever in Your Favor: Non-deterministic  
873 Mechanisms Diversifying Cell Surface Molecule Expression. *Front. Cell Dev. Biol.* **9**,  
874 720798 (2022).
- 875 40. Zozulya, S., Echeverri, F. & Nguyen, T. The human olfactory receptor repertoire.  
876 *Genome Biol.* **2**, research0018.1 (2001).
- 877 41. Lai, P. C. *et al.* An olfactory receptor pseudogene whose function emerged in  
878 humans: a case study in the evolution of structure–function in GPCRs. *J. Struct.*  
879 *Funct. Genomics* **9**, 29–40 (2008).
- 880 42. Niimura, Y. & Nei, M. Evolution of olfactory receptor genes in the human genome.  
881 *Proc. Natl. Acad. Sci.* **100**, 12235–12240 (2003).
- 882 43. Newman, T. & Trask, B. J. Complex Evolution of 7E Olfactory Receptor Genes in  
883 Segmental Duplications. *Genome Res.* **13**, 781–793 (2003).
- 884 44. Noonan, J. P., Grimwood, J., Schmutz, J., Dickson, M. & Myers, R. M. Gene  
885 Conversion and the Evolution of Protocadherin Gene Cluster Diversity. *Genome*  
886 *Res.* **14**, 354–366 (2004).
- 887 45. Wirtz, E., Leal, S., Ochatt, C. & Cross, George A. M. A tightly regulated inducible  
888 expression system for conditional gene knock-outs and dominant-negative genetics  
889 in Trypanosoma brucei. *Mol. Biochem. Parasitol.* **99**, 89–101 (1999).
- 890 46. Isothermal Reaction (Gibson Assembly) Master Mix. *Cold Spring Harb. Protoc.*  
891 **2017**, pdb.rec090019 (2017).
- 892 47. Rico, E., Jeacock, L., Kovářová, J. & Horn, D. Inducible high-efficiency CRISPR-  
893 Cas9-targeted gene editing and precision base editing in African trypanosomes. *Sci.*  
894 *Rep.* **8**, 7960 (2018).
- 895 48. Gkeka, A. *et al.* Immunodominant Surface Epitopes Power Immune Evasion in the  
896 African Trypanosome. <http://biorxiv.org/lookup/doi/10.1101/2021.07.20.453071>  
897 (2021) doi:10.1101/2021.07.20.453071.
- 898 49. Shaw, S., Knüsel, S., Hoenner, S. & Roditi, I. A transient CRISPR/Cas9 expression  
899 system for genome editing in Trypanosoma brucei. *BMC Res. Notes* **13**, 268 (2020).
- 900 50. Zheng, Z. *et al.* Anchored multiplex PCR for targeted next-generation sequencing.  
901 *Nat. Med.* **20**, 1479–1484 (2014).
- 902 51. Tsai, S. Q. *et al.* GUIDE-seq enables genome-wide profiling of off-target cleavage by  
903 CRISPR-Cas nucleases. *Nat. Biotechnol.* **33**, 187–197 (2015).
- 904 52. Martin, M. Cutadapt removes adapter sequences from high-throughput sequencing  
905 reads. *EMB.journal* **17**, .
- 906 53. Fu, L., Niu, B., Zhu, Z., Wu, S. & Li, W. CD-HIT: accelerated for clustering the next-  
907 generation sequencing data. *Bioinformatics* **28**, 3150–3152 (2012).
- 908 54. Li, W. & Godzik, A. Cd-hit: a fast program for clustering and comparing large sets of  
909 protein or nucleotide sequences. *Bioinformatics* **22**, 1658–1659 (2006).

- 910 55. Amos, B. *et al.* VEuPathDB: the eukaryotic pathogen, vector and host bioinformatics  
911 resource center. *Nucleic Acids Res.* **50**, D898–D911 (2022).
- 912 56. Katoh, K. & Standley, D. M. MAFFT Multiple Sequence Alignment Software Version  
913 7: Improvements in Performance and Usability. *Mol. Biol. Evol.* **30**, 772–780 (2013).
- 914 57. Price, M. N., Dehal, P. S. & Arkin, A. P. FastTree: Computing Large Minimum  
915 Evolution Trees with Profiles instead of a Distance Matrix. *Mol. Biol. Evol.* **26**, 1641–  
916 1650 (2009).
- 917 58. Price, M. N., Dehal, P. S. & Arkin, A. P. FastTree 2 – Approximately Maximum-  
918 Likelihood Trees for Large Alignments. *PLoS ONE* **5**, e9490 (2010).
- 919 59. Markin, A. *et al.* PARNAS: Objectively Selecting the Most Representative Taxa on a  
920 Phylogeny. *Syst. Biol.* **72**, 1052–1063 (2023).
- 921 60. Schindelin, J. *et al.* Fiji: an open-source platform for biological-image analysis. *Nat.*  
922 *Methods* **9**, 676–682 (2012).
- 923 61. Glover, L. & Horn, D. Trypanosomal histone  $\gamma$ H2A and the DNA damage response.  
924 *Mol. Biochem. Parasitol.* **183**, 78–83 (2012).
- 925 62. Teufel, F. *et al.* SignalP 6.0 predicts all five types of signal peptides using protein  
926 language models. *Nat. Biotechnol.* **40**, 1023–1025 (2022).
- 927 63. Eddy, S. R. Accelerated Profile HMM Searches. *PLoS Comput. Biol.* **7**, e1002195  
928 (2011).
- 929 64. Meng, E. C. *et al.* UCSF CHIMERAX : Tools for structure building and analysis.  
930 *Protein Sci.* **32**, e4792 (2023).
- 931
- 932

933 **Supplemental figures**  
934

A Target: AGAAGCAGCCGCGACA CTGTTAATTTACG CCACGCACAAAATACAAGAC  
Read: AGAAGCAGCCGCGACA CTGTTAATTTACG TCAGGATGAAAGTGGAAGCA  
Donor: GCAAGAAGCCGGAACG CTGTTAATTTACG TCAGGATGAAAGTGGAAGCA

**Supplemental Figure 1. Mosaic recombination site**

A) A schematic of a recombination site. The region in yellow is the putative recombination site, shared by all 3 sequences.

935  
936

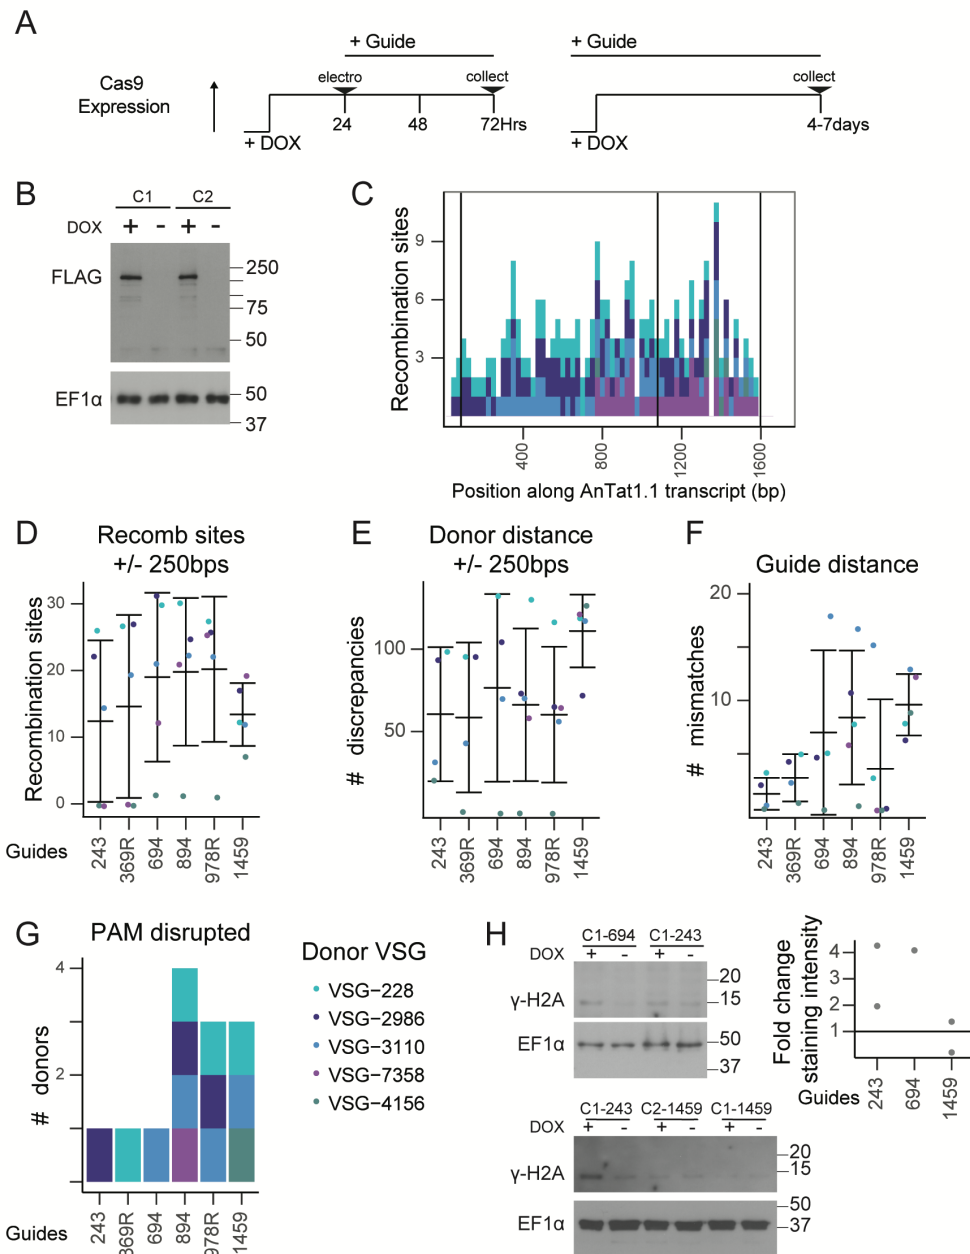

### Supplemental Figure 2. Cas9 system and sgRNA design and analysis

A) A schematic of the Cas9 induction experiment. Transient electroporation shown on the left while constitutive guide expression to isolate mosaic clones shown at right. B) An immunoblot showing FLAG-tagged Cas9 induction 24 hours following doxycycline treatment (DOX). DMSO was used as a vehicle control. EF1α was used as a loading control. C) A histogram showing the midpoint of all possible recombination sites 5bps or longer between AnTat1.1 and its family members. D) Quantification of the number of recombination sites within 250bps up or downstream of the cut site for each donor VSG. E) Quantification of the Levenshtein distance between AnTat1.1 and family members. This includes mismatches, insertions and deletions. F) Quantification of the number of mismatches at the guide binding site between AnTat1.1 and family members. G) Histogram of which donor VSGs can disrupt the PAM when used to repair AnTat1.1. H) An immunoblot of  $\gamma$ -H2A from doxycycline induced clones and uninduced controls. DMSO was used as a vehicle control. Samples were normalized to EF1α loading and  $\gamma$ -H2A induction following doxycycline treatment after 24 hours was quantified at right.

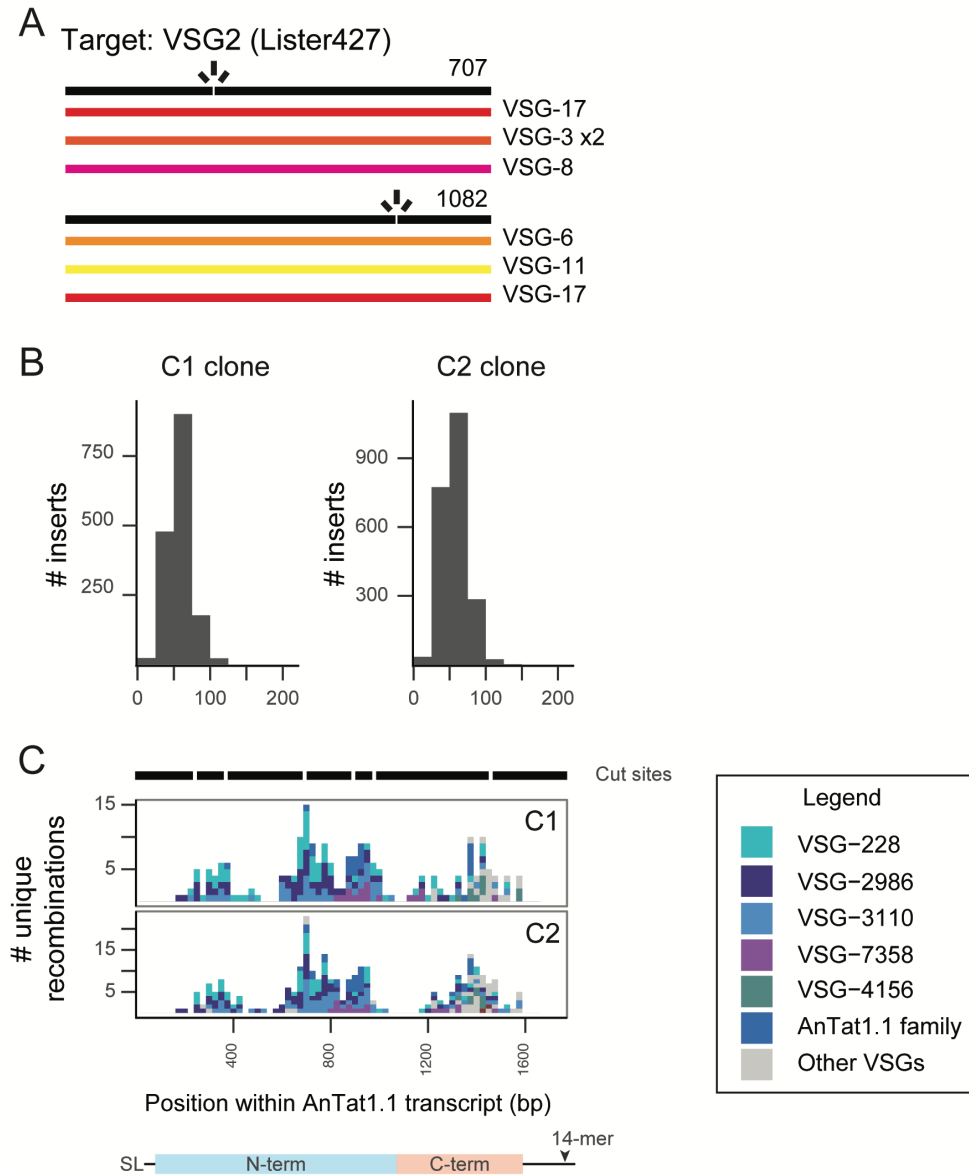

**Supplemental Figure 3. DNA breaks result in switchers if a homologous donor is not present**

A) A schematic showing identified switchers following a Cas9-induced double strand break within VSG-2 at locations 707 and 1082. B) Histograms of donor VSG insertion lengths identified in all mosaic VSG reads from Figure 2A). The insert length only includes newly inserted sequence and does not include recombination sites. Clone C1 and C2 sequenced via VSG-AMP-seq are shown separately. The limit of detection for an insertion is approximately 200 bp. C) A histogram with a summary of the unique recombination sites found within guide-induced break for each clone. Cut sites are indicated above the histograms as gaps within the black line. The midpoint of the perfect homology between AnTat1.1 and the donor VSG at the recombination site is plotted. If a donor VSG could not be unambiguously identified, the average recombination position was plotted. The legend for the donor VSG colors is to the right. SL = 5' splice leader cap, 14-mer = 3' sequence conserved in all VSG transcripts

938

939

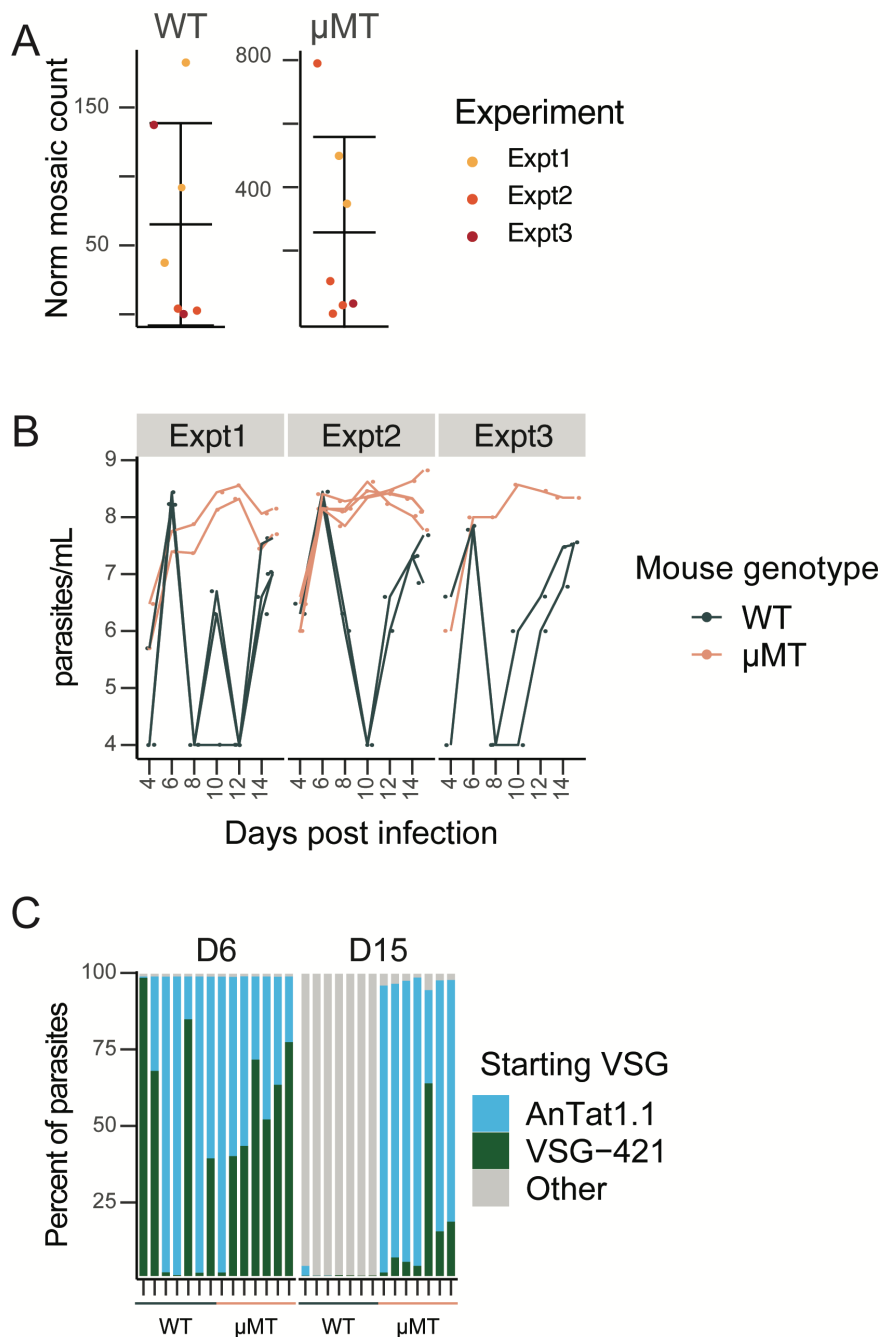

**Supplemental Figure 4. Mouse infection extended data**

A) Quantification of the number of recombination events detected per mouse. Each mouse was normalized to the number of total consolidated, aligned, and unanchored reads compared to the consolidated, aligned, unanchored read count for one mouse to control for sequencing depth. This was performed separately for each genotype. B) A time course of the parasitemia for the mouse infections. Blood was harvested every two days. C) Quantification of the percent of parasites expressing the starting VSG at D6 and D15 post-infection as quantified by VSG-seq.

940

941

942 Supplemental Table 1

| Guide Primers                          |                                                                                                                                                            |                               |
|----------------------------------------|------------------------------------------------------------------------------------------------------------------------------------------------------------|-------------------------------|
| Primer Name                            | Sequence                                                                                                                                                   |                               |
| AnTat1.1_243                           | GAAATTAATACGACTCACTATAGGATTCAAAAACGGCCAAAC<br>GCCGTTTTAGAGCTAGAAATAGC                                                                                      |                               |
| AnTat1.1_369R                          | GAAATTAATACGACTCACTATAGGGGCGTAAATTAACAGTGT<br>CGGTTTTAGAGCTAGAAATAGC                                                                                       |                               |
| AnTat1.1_694                           | GAAATTAATACGACTCACTATAGGAGTACAGACCCAGAAGCC<br>AGGTTTTAGAGCTAGAAATAGC                                                                                       |                               |
| AnTat1.1_894                           | GAAATTAATACGACTCACTATAGGACGCCGGTGTGCGCAGCT<br>AAACGTTTTAGAGCTAGAAATAGC                                                                                     |                               |
| AnTat1.1_978R                          | GAAATTAATACGACTCACTATAGGGTCTGTTGGCTGCTTGGAG<br>TTGTTTTAGAGCTAGAAATAGC                                                                                      |                               |
| AnTat1.1_1459                          | GAAATTAATACGACTCACTATAGGACCAATCCAGAAAAGTGC<br>AAGTTTTAGAGCTAGAAATAGC                                                                                       |                               |
| G00                                    | AAAAGCACCGACTCGGTGCCACTTTTTCAAGTTGATAACGGGA<br>CTAGCCTTATTTAACTTGCTATTTCTAGCTCTAAAAC                                                                       |                               |
| Annealed Guides for T7-sgRNA insertion |                                                                                                                                                            |                               |
| Fragment Name                          | FWD                                                                                                                                                        | REV                           |
| AnTat1.1_243                           | AGGGATTCAAAAACGGCCAA<br>ACGCC                                                                                                                              | AAACGGCGTTTGGCCGTTTT<br>TGAAT |
| AnTat1.1_694                           | AGGGAGTACAGACCCAGAA<br>GCCAG                                                                                                                               | AAACCTGGCTTCTGGGTCTG<br>TACT  |
| VSG-2_707                              | AGGGACCAACGGCCTCGGC<br>AAAAG                                                                                                                               | AAACCTTTTGCCGAGGCCGT<br>TGGT  |
| VSG-2_1082                             | AGGGCCAGTGGCGCAAAC<br>CTGGT                                                                                                                                | AAACACCAGGTTTTGCGCCA<br>CTGG  |
| DNase Verification Primers             |                                                                                                                                                            |                               |
| Primer Name                            | FWD                                                                                                                                                        | REV                           |
| HSP-70<br>(Tb927.11.11330)             | AGAACACTATCAATGACCCC<br>AAC                                                                                                                                | CCATGCCCTGGTACATCT            |
| Hyg                                    | ACAGCGGTCATTGACTGGA<br>G                                                                                                                                   | ATTTGTGTACGCCCGACAGT          |
| VSG-AMP-seq Primers                    |                                                                                                                                                            |                               |
| Primer Name                            | Sequence                                                                                                                                                   |                               |
| All-VSG-3'UTR                          | GTGTTAAAATATATC                                                                                                                                            |                               |
| Y-adaptor%                             | [Phos]GATCGGAAGAGC*C*A                                                                                                                                     |                               |
| A01 <sup>^</sup>                       | AATGATACGGCGACCACCGAGATCTACACTAGATCGC(N:252<br>52525)(N)(N)(N)(N)(N)(N)(N)(N)(N)(N)(N)(N)(N)(N)(N)(<br>N)(N)(N)(N)(N)ACACTCTTCCCTACACGACGCTCTTCCGA<br>TC*T |                               |
| A03 <sup>^</sup>                       | AATGATACGGCGACCACCGAGATCTACACTATCCTCT(N:252<br>52525)(N)(N)(N)(N)(N)(N)(N)(N)(N)(N)(N)(N)(N)(N)(N)(<br>N)(N)(N)(N)(N)ACACTCTTCCCTACACGACGCTCTTCCGA         |                               |





|                                   |                                                                        |
|-----------------------------------|------------------------------------------------------------------------|
| P710                              | CAAGCAGAAGACGGCATAACGAGATCGATGTGCGTGACTGGA<br>GTCCTCTCTATGGGCAGTCGGTGA |
| AnTat1.1_1F <sup>&amp;</sup>      | CCTCTCTATGGGCAGTCGGTGAT(N) <sub>0-7</sub><br>CGCAAACACTACAACGAGCC      |
| AnTat1.1_2F <sup>&amp;</sup>      | CCTCTCTATGGGCAGTCGGTGAT(N) <sub>0-7</sub><br>CAGAATGCGACACGGAAAGC      |
| AnTat1.1_3F <sup>&amp;</sup>      | CCTCTCTATGGGCAGTCGGTGAT(N) <sub>0-7</sub><br>ACGCAGGCGGCTTCAAACA       |
| AnTat1.1_4F <sup>&amp;</sup>      | CCTCTCTATGGGCAGTCGGTGAT(N) <sub>0-7</sub><br>AACAGCCGCAGCAACCAAAC      |
| AnTat1.1_0R <sup>&amp;</sup>      | CCTCTCTATGGGCAGTCGGTGAT(N) <sub>0-7</sub><br>GGCCACAAATGCGGCAGAAAC     |
| AnTat1.1_1R <sup>&amp;</sup>      | CCTCTCTATGGGCAGTCGGTGAT(N) <sub>0-7</sub><br>GCCATAAGCTGCGGTTTCGT      |
| AnTat1.1_2R <sup>&amp;</sup>      | CCTCTCTATGGGCAGTCGGTGAT(N) <sub>0-7</sub><br>GTTGTGTATGGTTAGCAGGC      |
| AnTat1.1_3R <sup>&amp;</sup>      | CCTCTCTATGGGCAGTCGGTGAT(N) <sub>0-7</sub><br>CTTGTATTTTGTGCGTGCGC      |
| Index1 <sup>%</sup>               | ATCACCGACTGCCCATAGAGAGGACTCCAGTCAC                                     |
| Read2 <sup>%</sup>                | GTGACTGGAGTCCTCTCTATGGGCAGTCGGTGAT                                     |
| Miscellaneous Additional Primers  |                                                                        |
| Name                              | Sequence                                                               |
| SL-FWD                            | ACAGTTTCTGTACTATATTG                                                   |
| SP6-14mer-REV                     | GATTTAGGTGACACTATAGTGTTAAAATATATC                                      |
| AnTat1.1 Sanger Sequencing Primer | AGAGAATACTAAGCTAGTTGGC                                                 |
| Pan AnTat1.1family FWD            | ACTACACCCACAACAAGCTCTA                                                 |

943 \* = indicates a phosphorotiolate bond modification

944 [Phos] = 5' phosphorylation

945 ^ = hand mixing

946 & = machine mixing

947 % = HPLC purification

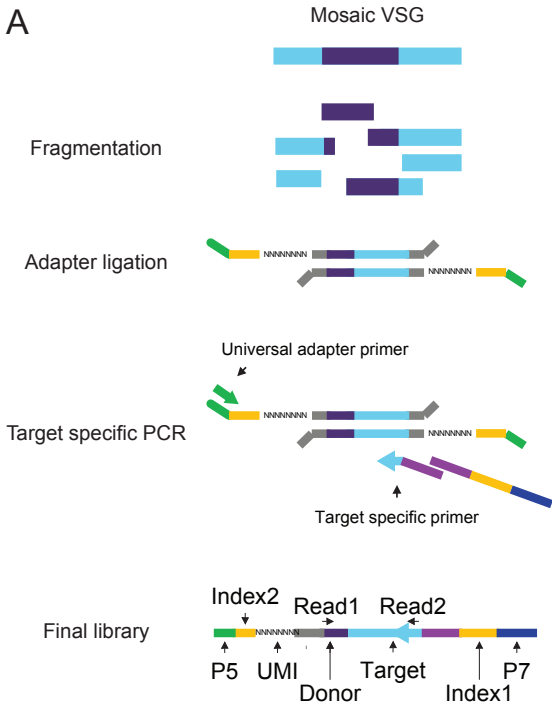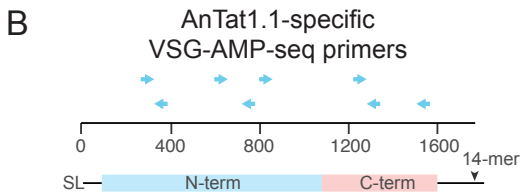

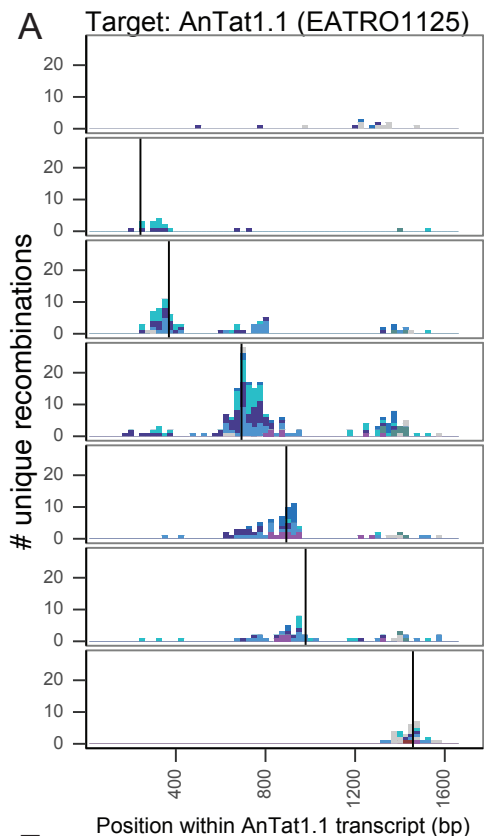

Cut position

No guide

243

369R

694

894

978R

1459

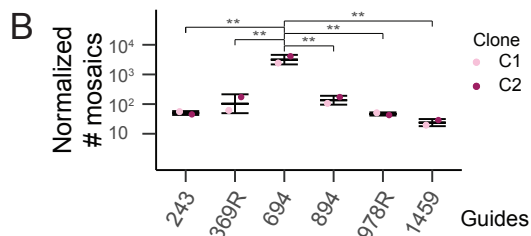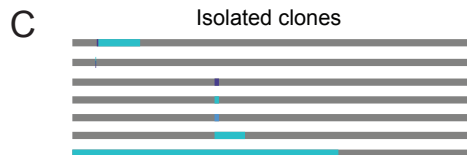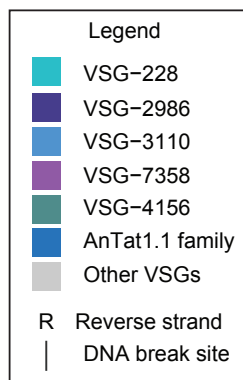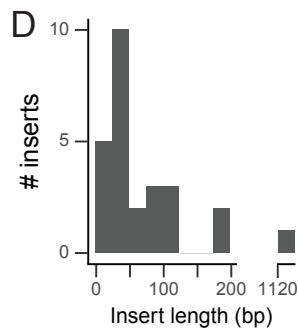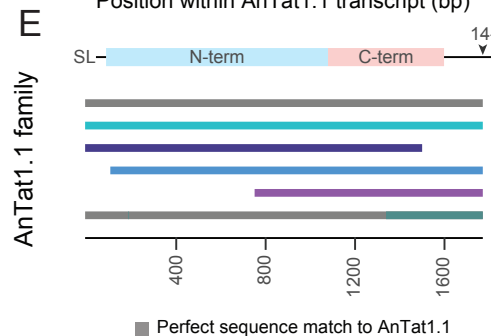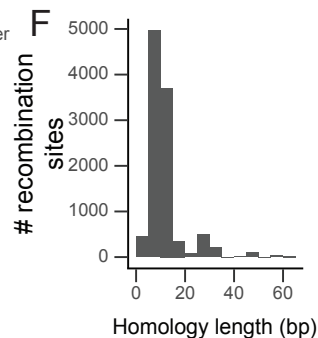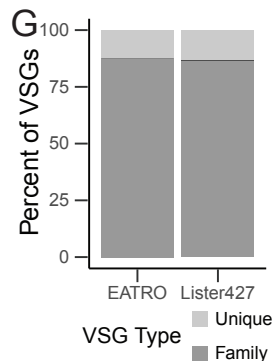

**A**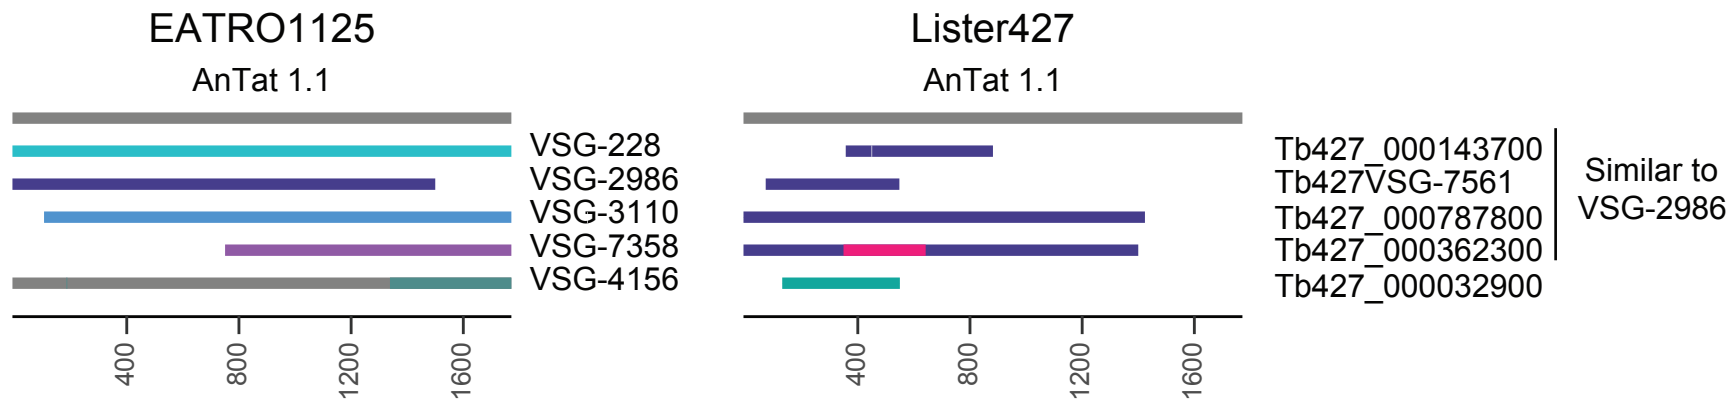**B**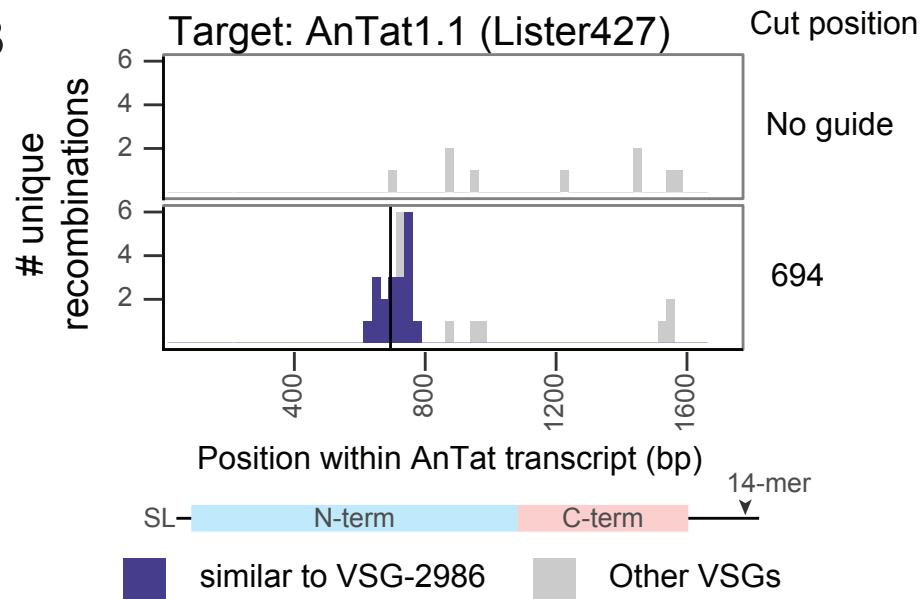**C**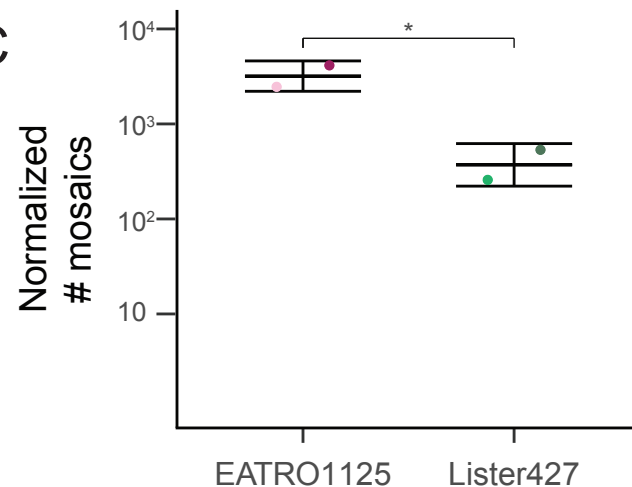

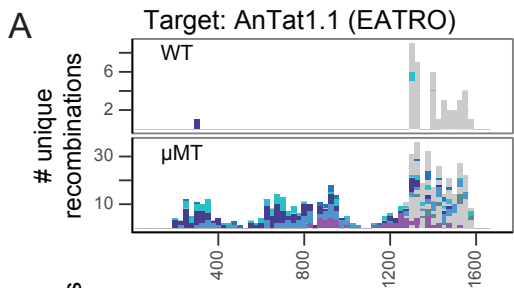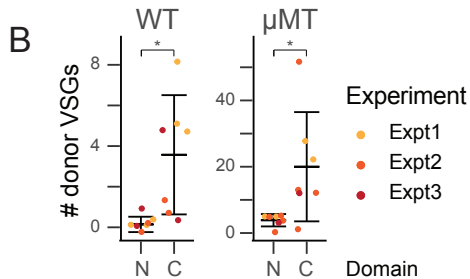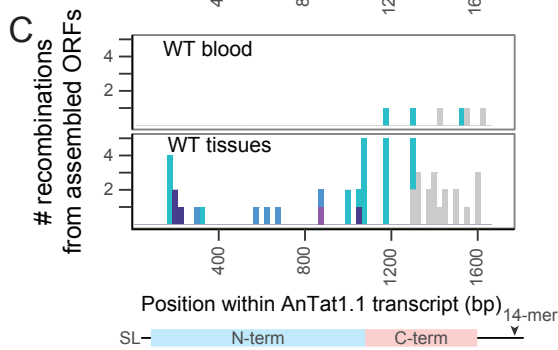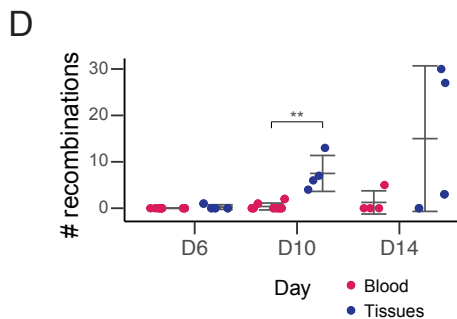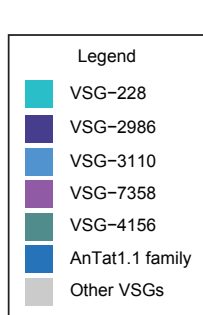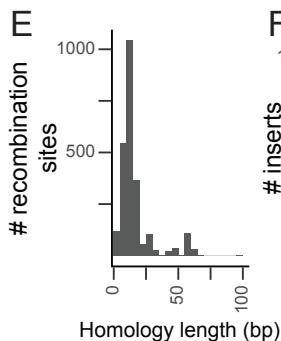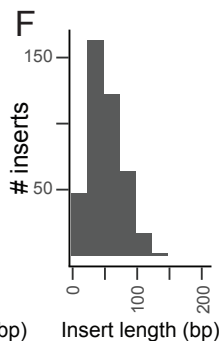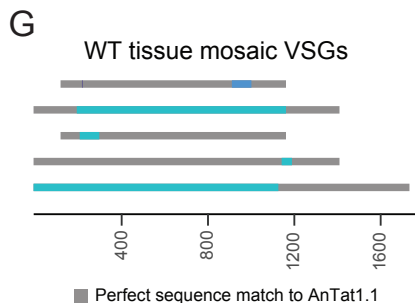

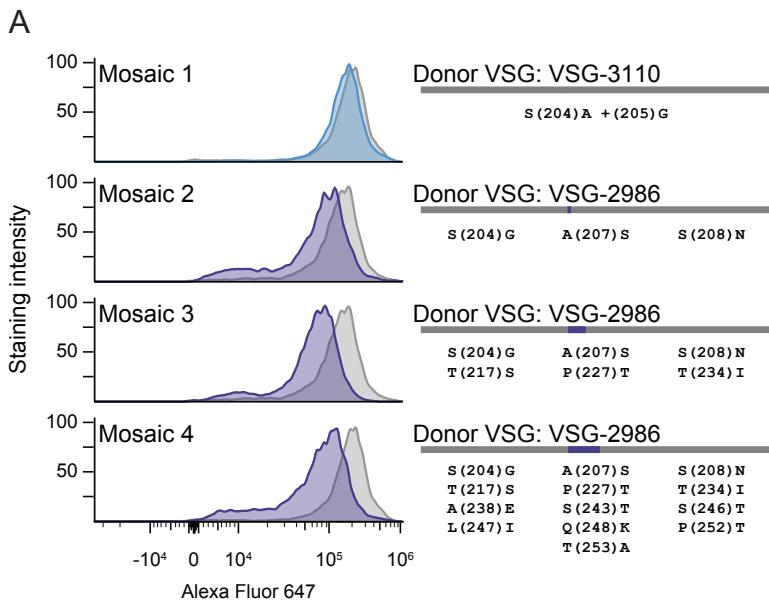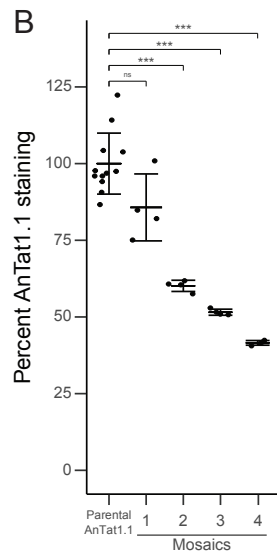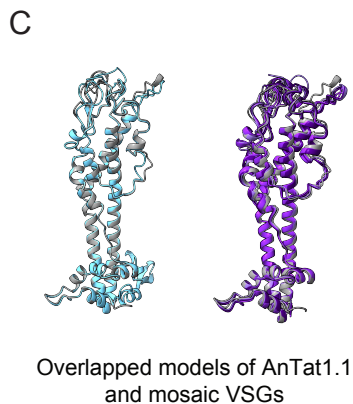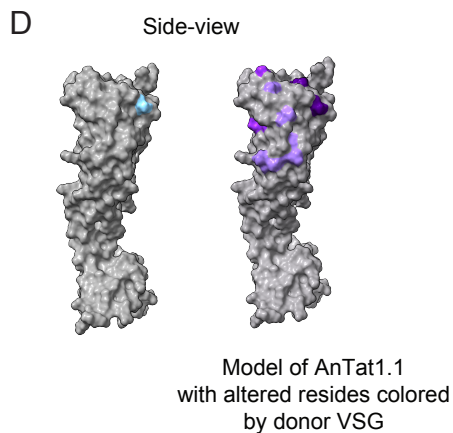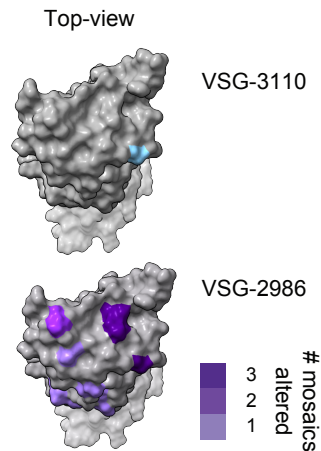

Source: https://www.biorxiv.org/content/biorxiv/early/2024/03/22/2024.03.22.582209.full.pdf
